# Supplementary material for: What are the chances for personalised treatment with antidepressants? Detection of patient-by-treatment interaction with a variance ratio meta-analysis
Source: PubMed Central journal article supplement — BMJ Open. 2019 Dec 23;9(12):e034816. doi: 10.1136/bmjopen-2019-034816 (PMC7008413; doi:10.1136/bmjopen-2019-034816), 2019-12-23
Supplement: bmjopen-2019-034816.draft_revisions.pdf [file bmjopen-2019-034816.draft_revisions.pdf]

# BMJ Open

BMJ Open is committed to open peer review. As part of this commitment we make the peer review history of every article we publish publicly available.

When an article is published we post the peer reviewers' comments and the authors' responses online. We also post the versions of the paper that were used during peer review. These are the versions that the peer review comments apply to.

The versions of the paper that follow are the versions that were submitted during the peer review process. They are not the versions of record or the final published versions. They should not be cited or distributed as the published version of this manuscript.

BMJ Open is an open access journal and the full, final, typeset and author-corrected version of record of the manuscript is available on our site with no access controls, subscription charges or pay-per-view fees (<http://bmjopen.bmj.com>).

If you have any questions on BMJ Open's open peer review process please email [info.bmjopen@bmj.com](mailto:info.bmjopen@bmj.com)

# BMJ Open

## What are the chances for personalized treatment with antidepressants? Detection of patient by treatment interaction with a variance ratio meta-analysis

|                               |                                                                                                                                                                                                                                                                                                                                                                |
|-------------------------------|----------------------------------------------------------------------------------------------------------------------------------------------------------------------------------------------------------------------------------------------------------------------------------------------------------------------------------------------------------------|
| Journal:                      | <i>BMJ Open</i>                                                                                                                                                                                                                                                                                                                                                |
| Manuscript ID                 | bmjopen-2019-034816                                                                                                                                                                                                                                                                                                                                            |
| Article Type:                 | Original research                                                                                                                                                                                                                                                                                                                                              |
| Date Submitted by the Author: | 08-Oct-2019                                                                                                                                                                                                                                                                                                                                                    |
| Complete List of Authors:     | Plöderl, Martin; Christian Doppler Clinic, Paracelsus Medical University, Dept. of Clinical Psychology and Dept. for Crisis Intervention and Suicide Prevention, University Clinic for Psychiatry, Psychotherapy, and Psychosomatics<br>Hengartner, Michael; Zurich University of Applied Sciences/ZHAW, Section for Clinical Psychology and Health Psychology |
| Keywords:                     | Depression & mood disorders < PSYCHIATRY, STATISTICS & RESEARCH METHODS, PSYCHIATRY                                                                                                                                                                                                                                                                            |
|                               |                                                                                                                                                                                                                                                                                                                                                                |

SCHOLARONE™  
Manuscripts

1  
2  
3 ***What are the chances for personalized treatment with antidepressants?***  
4 ***Detection of patient by treatment interaction with a variance ratio***  
5 ***meta-analysis***  
6  
7  
8

9 Martin Plöderl<sup>1\*</sup>, Michael P. Hengartner<sup>2</sup>

10  
11  
12  
13  
14 <sup>1</sup> Department of Crisis Intervention and Suicide Prevention/Christian Doppler Clinic, Paracelsus  
15 Medical University, Salzburg, Austria.

16  
17  
18 <sup>2</sup> Department of Applied Psychology, Zurich University of Applied Sciences, Zurich, Switzerland.  
19

20  
21  
22  
23  
24  
25 **Short Title:** Personalized antidepressants treatment

26  
27 **Word count:** 2932  
28

29  
30  
31  
32 **\*Corresponding Author**

33 Martin Plöderl PhD

34 Dept. of Crisis Intervention and Suicide Prevention

35 Christian Doppler Klinik,

36 Paracelsus Medical University,

37 Ignaz Harrer-Straße 79

38 A-5020 Salzburg

39 AUSTRIA

40 Phone: +43-5-7255-56679

41 Fax: +43-5-7255-4344

42 E-mail: M.Ploederl@salk.at  
43  
44  
45  
46  
47  
48  
49  
50  
51  
52  
53  
54  
55  
56  
57  
58  
59  
60

## ABSTRACT

### Objectives

To investigate if there is notable patient by treatment interaction in the pharmacological treatment of depression, a necessary but largely unexplored prerequisite of personalized antidepressant treatment.

### Design

Meta-analytic variance-comparison of treatment-outcome between drug arms and placebo arms of clinical trials, based on the assumption that patient by treatment interaction should lead to larger variances in drug arms than placebo arms. To put the results into context, we run simple simulations, assuming different definitions and rates of those who respond especially well to antidepressants.

### Data sources

163 randomized, placebo-controlled trials (51,137 patients) with complete results for pre-post differences, selected from a recently published systematic review.

### Analysis

Variance ratios (VR) and coefficients of variance ratios (CVR) of individual trials were meta-analytically combined. The analysis was repeated for classes of antidepressants and specific antidepressants.

### Results

Variance ratios (VR = 1.01, CI 0.99-1.02) and coefficient of variance ratios (CVR = 0.82, CI 0.80-0.84) of the antidepressant-treatment arms were comparable or smaller than in placebo-arms. Similar results were observed for classes of antidepressants and for specific antidepressants. Our simulation

1  
2  
3 analysis confirmed that equal variance ratios can only be obtained if they are not more than a few  
4  
5 patients who respond slightly above average.  
6  
7

## 8 **Conclusions**

9

10  
11 The lack of increased of treatment-outcome variance in the antidepressants versus placebo groups in  
12  
13 RCT indicates that no or only very small subgroups of patients respond particularly well to  
14  
15 antidepressants. Thus, the scope for personalized treatment with antidepressants seems to be  
16  
17 limited.  
18  
19  
20  
21  
22  
23

24 **Keywords:** antidepressants, personalized medicine, treatment heterogeneity, variance ratio, meta-  
25  
26 analysis  
27  
28  
29  
30  
31  
32  
33  
34  
35  
36  
37  
38  
39  
40  
41  
42  
43  
44  
45  
46  
47  
48  
49  
50  
51  
52  
53  
54  
55  
56  
57  
58  
59  
60

## STRENGTHS AND LIMITATIONS OF THIS STUDY

- For the first time, the amount of patient by treatment interaction (treatment heterogeneity), a necessary prerequisite for personalized medicine, is estimated for the pharmacological treatment of depression with antidepressants.
- The data-base is from a systematic review of published and unpublished studies and is one of the largest so far, resulting in precise estimations of the main outcomes.
- The study results are important to inform further attempts in personalized medicine in psychiatry.
- As with all clinical trials, it remains an open question if our results can be replicated in real-world settings, for example among psychiatric inpatients with very severe depression.

## SUMMARY BOX

### What is already known on this topic?

- There is massive research effort to find subgroups of patients who respond especially well to antidepressant treatment (personalized medicine).
- Personalized antidepressant treatment rests on the assumption that treatment heterogeneity exists, i.e., that there is notable patient by treatment interaction.
- The existence of notable treatment heterogeneity has been questioned in other fields but has not been explored for antidepressant treatment.

### What this study adds

- The results from our study suggest that no or only a very small subgroups of patients respond particularly well to antidepressants.
- The success for research into personalized treatment with antidepressants seems to be limited.
- The average drug-placebo difference appears to be the most accurate prediction of treatment response for individual patients

## INTRODUCTION

Personalized or precision medicine, i.e., applying medical interventions only to those patients known to benefit especially well to the intervention (henceforth termed “benefiters”), is important to increase benefits from treatment and to decrease harms. For example, if a drug with severe side effects is very effective in some patients with a specific genotype, it is crucial to know about these benefiters, because for all other patients, the risk-benefit ratio would be unfavorable. Similarly, if a drug is found to have only modest efficacy across all patients but notable side-effects, then it would be important to know if there are patients (e.g., those defined via a specific biomarker) who are benefiters. The latter example corresponds with the pharmacological treatment of major depression, because the average efficacy of antidepressants (AD) is modest, corresponding to, on average, only about 2 points difference on the Hamilton Depression Rating Scale (HDRS) between AD groups and placebo in randomized controlled short-term trials (RCT).<sup>1-5</sup> Put differently, according to our most recent estimate, there is about 88% overlap in distribution of depression scores between antidepressants and placebo at the end of acute treatment.<sup>2</sup>

Despite substantial research efforts, no predictors of treatment success with AD were found that were robust and reliable enough for use in clinical practice.<sup>6-9</sup> Thus, much of the variance of the treatment outcome remains unexplained thus far. Sources of outcome variation include variation between treatment arms (indicating that group means differ due to efficacy of treatments, e.g., AD versus placebo), variation between patients (indicating that the outcome differs from patient to patient, independent of the treatment received), variation within patients (indicating that the outcome for the same patient differs over time due to random symptom fluctuations), and patient-by-treatment interactions (indicating that treatment effects vary from patient to patient).<sup>10</sup> The quest for personalized medicine in the case of AD assumes that specific patients benefit more from AD than others, i.e., assumes that there is a patient-by-treatment interaction. Ideally, this can also be explained by a plausible causal mechanism, e.g. inter-individual differences in monoamine function.



1  
2  
3 Investing research efforts in personalized medicine only makes sense if there truly is a patient-by-  
4 drug interaction that explains some variance in the treatment outcome. Although the field is mostly  
5 enthusiastic about personalized medicine or precision psychiatry,<sup>11</sup> experts from various fields now  
6 start to dampen expectations and caution that personalized/precision medicine may fall short of  
7 expectations.<sup>12-14</sup>  
8  
9  
10  
11  
12  
13  
14

15 Thus, we must remain mindful that there might be no notable subgroup of true AD benefiter  
16 and that the modest average treatment effect is the best we can hope for.<sup>15</sup> We further need to  
17 acknowledge that RCT are inherently limited to demonstrate patient-by-treatment interactions.<sup>10</sup> To  
18 identify patient-by-treatment interactions, repeated period cross-over trials are necessary, but these  
19 are hardly feasible with common AD due to delayed onset of therapeutic effect and relatively high  
20 rates of spontaneous remission. The most common trial design is the simple parallel-group trial,  
21 where patients are randomized to either AD or placebo. However, these trials can only identify mean  
22 differences between treatment arms (i.e., efficacy), whereas variation between patients, within  
23 patients, as well as patient-by-treatment interactions are part of the error term. Nevertheless, if  
24 patient-by-treatment interaction effects are present, then the variance in the treatment outcome  
25 should be increased in the drug group relative to the placebo group, because no comparable drug-  
26 by-patient interaction is present in the placebo group.<sup>10 16 17</sup> Thus, results from RCT can inform  
27 indirectly if there might be subgroups of benefiter.  
28  
29  
30  
31  
32  
33  
34  
35  
36  
37  
38  
39  
40  
41  
42  
43  
44

45 The goal of this meta-analysis was to examine whether the outcome-variances between AD  
46 and placebo differ, in order to gauge the potential of personalized/precision psychiatry for treatment  
47 with AD.  
48  
49  
50  
51  
52  
53  
54  
55  
56  
57  
58  
59  
60

## METHODS

### Data

Our analysis was based on short-term RCT of AD for patients with unipolar major depression, reported in the most recent systematic review.<sup>18</sup> The authors of this comprehensive study made the data available in a public repository <https://data.mendeley.com/datasets/83rthbp8ys/2>. This included 522 trials (with 21 different AD), of which 253 trials were suitable for further analysis, i.e., contained information about the outcome and also included a placebo-arm. In case trials had multiple treatment arms with different dosages of AD, these arms were aggregated. In case of trials compared different AD, the data of these arms were aggregated to only have one value for the drugs in these trials, similar as in a previous publication.<sup>16</sup> Additionally, we recorded different AD by their class (SNRI, SSRI, atypical AD, and tricyclic AD). For 168 (66%) of studies, the pre-post mean reduction of depression scores (M) and the related standard deviations (SD) were available, and only the analysis for these studies are reported here. Analysis for the 85 studies (34%) where only the mean value and standard deviation of the post-treatment depression scores were available are reported in an online supplement (<https://osf.io/98kex/files/>). Several additional variables were created for sensitivity analysis (see below).

### Patient and public involvement statement

This research was done without patient involvement. Patients were not invited to comment on the study design and were not consulted to develop patient relevant outcomes or interpret the results. Patients were not invited to contribute to the writing or editing of this document for readability or accuracy.

### Statistical analysis

#### Meta-analysis

We calculated the variance ratio (VR) for each RCT and aggregated them by means of a random effect meta-analysis according to the procedure suggested by Winkelbeiner et al.,<sup>16</sup> see <https://osf.io/qarvs/files/>, using the metafor package in R. Because the pre-post-differences were significantly associated with their SD, we repeated the analysis using the coefficient of the variance ratio (CVR). This removes the effect of expected changes in the standard deviation due to changes in the mean.<sup>19</sup> A VR of 1.00 suggest equal variance of AD and placebo. If the VR exceeds 1, then the variance of the AD group is larger than in the placebo group. If the CVR exceeds one, than the increase of variance with increasing pre-post-differences is stronger in the AD than in the placebo arms. Sensitivity analysis included meta-regression models with the assessment instruments, year of publication, type of publication (published vs. unpublished), sample size, and drop-out rates.

#### Simulation analysis

To bring our results into context, we also ran simulation analysis with different definitions and probabilities for benefiter. We based these simulations on an efficacy of 2 points mean-difference between AD and placebo groups, as reported in a meta-analysis on the same dataset for trials using the HDRS-17 instrument.<sup>5</sup> We assumed a standard deviation of SD=8 and a mean difference between pre-and post-depression-scores of 11 points in the AD group (based on rounded means of these values observed in our data-base). We used different cut-offs to define patients as benefiter, ranging from 5 to 10 points superior treatment outcome with the HDRS-17, and a proportion of 5 to 50% in the AD group vs. 0% in the placebo group. To simulate placebo groups, we sampled from a normal distribution with the above parameters for the placebo group (M = 9, SD = 8, and 5,000,000 samples). We used a similar sampling procedure for the AD-group, but created benefiter by adding necessary HDRS responder points to an assumed fraction of the sample, and adding as much points

1  
2  
3 to the rest of the sample to end up with the overall efficacy of 2 HDRS points.  
4

5 The R-code and data of this publication is available online (<https://osf.io/98kex/files/>).  
6  
7  
8  
9  
10  
11  
12

## 13 RESULTS

### 14 15 16 Meta-analysis

17  
18 Across all AD, the variance ratio was almost perfectly 1.00 with a narrow confidence interval (VR =  
19 1.01, 95%CI = 0.99 – 1.02). This means that the variances in the AD and placebo groups are identical  
20 (Table 1). Similar findings were found for all classes of AD (Table 1) and for each individual drug  
21 (online supplement <https://osf.io/98kex/files/>). There was no significant sign of heterogeneity in the  
22 meta-analyses, except for SSRIs. A closer inspection revealed that this resulted from a single outlier  
23 (see footnote in Table 1).  
24  
25  
26  
27  
28  
29  
30  
31  
32

33 ----- Insert Table 1 around here -----  
34

35 For the coefficient of variance ratio, results indicated that the increase of variance with increasing  
36 pre-post differences is less strong in AD than in placebo arms (CVR = 0.82, 95%CI = 0.80-0.84).  
37

38 Comparable results were found for all classes of AD and individual drugs (Table 1). The heterogeneity  
39 was statistically significant in nearly all meta-analyses of the CVR.  
40  
41  
42  
43

44 In the sensitivity analysis, the meta-regression models could not detect statistically significant effects  
45 for year of publication, type of publication, measurement-instruments, and sample size (see  
46 <https://osf.io/98kex/files/>). However, there was a small but statistically significant effect of the drop-  
47 out rates in drug-arms and the VRs. With increasing drop-out rates, the VRs slightly increased (p <  
48 .04).  
49  
50  
51  
52  
53  
54  
55  
56  
57  
58  
59  
60

### Simulation analysis

As shown in Figure 1, most benefiter assumptions lead to VRs much different from those we observed in our study.

----- Insert Figure 1 around here -----

However, for liberal definitions of benefitters and low rates of these benefitters, the VRs can indeed be small. For example, if there are 10% benefitters, as defined with 6 HDRS points difference to average placebo response, the VR is within the confidence interval of our main finding (0.99-1.02).

### DISCUSSION

We found nearly identical treatment outcome variances for AD arms compared to placebo in RCT for the acute treatment of major depression in a large database, as indicated by variance ratios almost perfectly being  $VR = 1$ . The simplest explanation for the finding of similar variances is that there are constant treatment effects and no treatment heterogeneity, i.e. no patient-by-treatment interaction effects and no specific subgroups of patients who respond particularly well to the treatment.<sup>20</sup>

Alternatively, such a subgroup of benefitters would be very small ( $\leq 10\%$ ) and the threshold to classify someone as benefiter would be low ( $\leq 6$  HDRS points difference to average placebo response). To put this in context, according to anchor-based linkage studies, at least 6 points on the HDRS are necessary for a global impression of "minimally improved".<sup>21 22</sup> Consequently, the search for meaningful predictors of relative treatment response (compared to placebo) will probably fail or will at least be very difficult due to the small subgroup of weak benefitters. Therefore, the mean effect size estimate from parallel-group RCT remains the best guess for predicting treatment outcome for an individual patient. Furthermore, the results for the coefficient of variance indicated that the increase of variance associated with increasing larger pre-post-differences was stronger in the

1  
2  
3 placebo than the AD groups. There is no immediately plausible explanation for this finding, given that  
4  
5 baseline severity does not predict differential treatment effects.<sup>23-25</sup>  
6  
7  
8  
9

10 Our findings are in line with Senn,<sup>12</sup> who argued that exploratory post-hoc delineation of putative  
11  
12 benefitters, such as the “true benefitters” suggested by Thase *et al.*,<sup>26</sup> are simply statistical artefacts  
13  
14 due to random symptom fluctuations and measurement error (see also Hengartner<sup>15</sup>). Our findings  
15  
16 also replicate the findings for antipsychotics in the acute treatment of schizophrenia,<sup>16</sup> and several  
17  
18 treatments in a review of various medical interventions.<sup>17</sup> Together, these studies indeed suggest  
19  
20 that the promises of precision medicine may remain elusive and that the scope for personalized  
21  
22 medicine might be smaller than previously hoped for.<sup>12 13</sup> Given the high expectations placed in  
23  
24 precision medicine, such findings will probably cause disbelief and reluctance in many advocates of  
25  
26 this enthusiastic movement. In anticipation of such critique, we would like to address two objections  
27  
28 that are likely to be submitted in response to this paper.  
29  
30  
31  
32

33 First, as recently stressed by biostatistics professor Dr. Frank Harrell, to assume that there is  
34  
35 treatment heterogeneity (i.e. significant patient-by-treatment interaction) when the average  
36  
37 treatment effect is close to zero (which is the case with AD), would imply that there must be a large  
38  
39 subgroup of patients where the treatment causes significant harm.<sup>27</sup> Although it has been suggested  
40  
41 that AD may worsen the long-term outcome of depression in some patients,<sup>28-31</sup> there is no evidence  
42  
43 that they may do harm in a large subgroup of patients in short-term trials. In the absence of  
44  
45 consistent biologically-informed patient-specific treatment effects, our best treatment estimate for  
46  
47 AD thus remains the average drug effect relative to placebo.<sup>27</sup>  
48  
49  
50

51  
52 Second, and closely related to the above argument, even after decades of massive research efforts  
53  
54 there is no evidence of robust neurobiological and genetic predictors of differential treatment  
55  
56 response in depression.<sup>6-9 32</sup> Biostatistics professor Dr. Stephen Senn once stated: „Unless patient by  
57  
58 treatment interaction exists, it is pointless looking for gene by treatment interactions”.<sup>33</sup> Thus, calling  
59  
60

1  
2  
3 for more genetic research into differential treatment effects clearly conflicts with the current  
4  
5 literature and will most likely fail to yield the hoped-for results.  
6  
7  
8  
9

10 We acknowledge the following major limitation: as Cortés *et al.*<sup>17</sup> describe in their paper, equal  
11  
12 variances are no definite proof for a lack of patient-by-treatment interactions. They hypothetically  
13  
14 describe a situation that leads to equal variances in the treatment and in the control condition and  
15  
16 with patient-by-treatment interactions, but this situation is highly unlikely.  
17  
18  
19  
20  
21  
22

23 In conclusion, the results of our meta-analysis suggest that there is no or at best a very small patient-  
24  
25 by-treatment interaction. The lack of increased outcome-variance in the AD vs. placebo groups in  
26  
27 parallel-group RCT indicates that no specific subgroup of patients may respond particularly well to  
28  
29 AD. Thus, with the AD currently available, the scope for personalized AD treatments is probably  
30  
31 limited and it is unlikely that precision psychiatry will succeed in finding clinical or biological  
32  
33 predictors of differential treatment response that would account for a therapeutic effect that goes  
34  
35 beyond a minimal clinical improvement.  
36  
37  
38  
39  
40  
41  
42  
43  
44  
45  
46  
47  
48  
49  
50  
51  
52  
53  
54  
55  
56  
57  
58  
59  
60

## STATEMENTS

### Acknowledgements

We thank Cipriani et al.<sup>18</sup> and Winkelbeiner et al.<sup>16</sup> for making the data and the R-code publicly available.

### Contributors

MP and MPH were responsible for the conception and design of the study, interpretation of data, and drafting and revising the manuscript. MP performed the meta-analysis and simulation analysis.

All authors had had full access to all the data and take responsibility for the integrity of the data and the accuracy of the data analysis.

### Ethical approval

No ethical approval is required since our study is a secondary analysis.

### Transparency and data-sharing statement

The lead author affirms that this manuscript is an honest, accurate, and transparent account of the study being reported; that no important aspects of the study have been omitted. The data and statistical code are available online.

### Role of funding source

This research received no specific grant from any funding agency, commercial or not-for-profit sectors. The authors declare that they have no financial conflicts of interest.



## REFERENCES

1. Hengartner MP. What is the threshold for a clinical minimally important drug effect? *BMJ Evid Based Med* 2018 doi: 10.1136/bmjebm-2018-111056
2. Hengartner MP, Plöderl M. Statistically significant antidepressant-placebo differences on subjective symptom-rating scales do not prove that the drugs work: Effect size and method bias matter! *Front Psychiatry* 2018;9:517. doi: 10.3389/fpsy.2018.00517
3. Jakobsen JC, Katakam KK, Schou A, et al. Selective serotonin reuptake inhibitors versus placebo in patients with major depressive disorder. A systematic review with meta-analysis and Trial Sequential Analysis. *BMC Psychiatry* 2017;17(1):58. doi: 10.1186/s12888-016-1173-2
4. Moncrieff J, Kirsch I. Efficacy of antidepressants in adults. *BMJ* 2005;331(7509):155-7. doi: 10.1136/bmj.331.7509.155
5. Munkholm K, Paludan-Muller AS, Boesen K. Considering the methodological limitations in the evidence base of antidepressants for depression: a reanalysis of a network meta-analysis. *BMJ Open* 2019;9(6):e024886. doi: 10.1136/bmjopen-2018-024886
6. Perlman K, Benrimoh D, Israel S, et al. A systematic meta-review of predictors of antidepressant treatment outcome in major depressive disorder. *J Affect Disord* 2019;243:503-15. doi: 10.1016/j.jad.2018.09.067 [published Online First: 2018/10/05]
7. Simon GE, Perlis RH. Personalized medicine for depression: can we match patients with treatments? *Am J Psychiatry* 2010;167(12):1445-55. doi: 10.1176/appi.ajp.2010.09111680 [published Online First: 2010/09/17]
8. Widge AS, Bilge MT, Montana R, et al. Electroencephalographic Biomarkers for Treatment Response Prediction in Major Depressive Illness: A Meta-Analysis. *Am J Psychiatry* 2019;176(1):44-56. doi: 10.1176/appi.ajp.2018.17121358 [published Online First: 2018/10/04]

- 1  
2  
3 9. Tansey KE, Guipponi M, Perroud N, et al. Genetic predictors of response to serotonergic and  
4  
5 noradrenergic antidepressants in major depressive disorder: a genome-wide analysis of  
6  
7 individual-level data and a meta-analysis. *PLoS Med* 2012;9(10):e1001326. doi:  
8  
9 10.1371/journal.pmed.1001326  
10
- 11  
12 10. Senn S. Mastering variation: variance components and personalised medicine. *Stat Med*  
13  
14 2016;35(7):966-77. doi: 10.1002/sim.6739 [published Online First: 2015/09/30]  
15
- 16  
17 11. Fernandes BS, Williams LM, Steiner J, et al. The new field of 'precision psychiatry'. *BMC Med*  
18  
19 2017;15 doi: 10.1186/s12916-017-0849-x  
20
- 21  
22 12. Senn S. Statistical pitfalls of personalized medicine. *Nature* 2018;563(7733):619-21. doi:  
23  
24 10.1038/d41586-018-07535-2  
25
- 26  
27 13. Joyner MJ, Paneth N. Promises, promises, and precision medicine. *J Clin Invest* 2019;129(3):946-  
28  
29 48. doi: 10.1172/JCI126119  
30
- 31  
32 14. Prasad V, Fojo T, Brada M. Precision oncology: origins, optimism, and potential. *Lancet Oncol*  
33  
34 2016;17(2):e81-e86. doi: 10.1016/S1470-2045(15)00620-8  
35
- 36  
37 15. Hengartner MP. Scientific debate instead of beef; challenging misleading arguments about the  
38  
39 efficacy of antidepressants. *Acta Neuropsychiatr* 2019;31(4):235-36. doi:  
40  
41 10.1017/neu.2019.23  
42
- 43  
44 16. Winkelbeiner S, Leucht S, Kane JM, et al. Evaluation of Differences in Individual Treatment  
45  
46 Response in Schizophrenia Spectrum Disorders: A Meta-analysis. *JAMA Psychiatry* 2019 doi:  
47  
48 10.1001/jamapsychiatry.2019.1530  
49
- 50  
51 17. Cortés J, González JA, Medina MN, et al. Does evidence support the high expectations placed in  
52  
53 precision medicine? A bibliographic review [version 5; peer review: 1 approved, 2 approved  
54  
55 with reservations, 3 not approved]. *F1000Research* 2019;7:30. doi:  
56  
57 <https://doi.org/10.12688/f1000research.13490.5>  
58  
59  
60

- 1  
2  
3 18. Cipriani A, Furukawa TA, Salanti G, et al. Comparative efficacy and acceptability of 21  
4 antidepressant drugs for the acute treatment of adults with major depressive disorder: a  
5 systematic review and network meta-analysis. *Lancet* 2018;391(10128):1357-66. doi:  
6  
7  
8  
9  
10 10.1016/S0140-6736(17)32802-7  
11  
12 19. Nakagawa S, Poulin R, Mengersen K, et al. Meta-analysis of variation: ecological and evolutionary  
13 applications and beyond. *Methods in Ecology and Evolution* 2015;6(2):143-52. doi:  
14  
15  
16 10.1111/2041-210x.12309  
17  
18 20. Cortes J, Gonzalez JA, Medina MN, et al. Does evidence support the high expectations placed in  
19 precision medicine? A bibliographic review. *F1000Res* 2018;7:30. doi:  
20  
21  
22 10.12688/f1000research.13490.5  
23  
24  
25 21. Furukawa TA, Akechi T, Azuma H, et al. Evidence-based guidelines for interpretation of the  
26 Hamilton Rating Scale for Depression. *J Clin Psychopharmacol* 2007;27(5):531-4. doi:  
27  
28  
29 10.1097/JCP.0b013e31814f30b1  
30  
31  
32 22. Leucht S, Fennema H, Engel R, et al. What does the HAMD mean? *J Affect Disord* 2013;148(2-  
33 3):243-8. doi: 10.1016/j.jad.2012.12.001  
34  
35  
36 23. Rabinowitz J, Werbeloff N, Mandel FS, et al. Initial depression severity and response to  
37 antidepressants v. placebo: patient-level data analysis from 34 randomised controlled trials.  
38  
39  
40  
41  
42 *Br J Psychiatry* 2016;209(5):427-28. doi: 10.1192/bjp.bp.115.173906  
43  
44 24. Furukawa TA, Maruo K, Noma H, et al. Initial severity of major depression and efficacy of new  
45 generation antidepressants: individual participant data meta-analysis. *Acta Psychiatr Scand*  
46  
47  
48 2018;137(6):450-58. doi: 10.1111/acps.12886  
49  
50 25. Hieronymus F, Lisinski A, Nilsson S, et al. Influence of baseline severity on the effects of SSRIs in  
51 depression: an item-based, patient-level post-hoc analysis. *Lancet Psychiat* 2019 doi:  
52  
53  
54 10.1016/S2215-0366(19)30216-0  
55  
56  
57  
58  
59  
60

- 1  
2  
3 26. Thase ME, Larsen KG, Kennedy SH. Assessing the 'true' effect of active antidepressant therapy v.  
4 placebo in major depressive disorder: use of a mixture model. *Br J Psychiatry*  
5 2011;199(6):501-7. doi: 10.1192/bjp.bp.111.093336  
6  
7  
8  
9  
10 27. Harrell FE, Jr. Viewpoints on heterogeneity of treatment effect and precision medicine. *Statistical*  
11 *Thinking*, 2019.  
12  
13  
14 28. Fava GA, Offidani E. The mechanisms of tolerance in antidepressant action. *Prog*  
15 *Neuropsychopharmacol Biol Psychiatry* 2011;35(7):1593-602. doi:  
16 10.1016/j.pnpbp.2010.07.026  
17  
18  
19  
20 29. El-Mallakh RS, Gao Y, Jeannie Roberts R. Tardive dysphoria: the role of long term antidepressant  
21 use in-inducing chronic depression. *Med Hypotheses* 2011;76(6):769-73. doi:  
22 10.1016/j.mehy.2011.01.020  
23  
24  
25  
26  
27 30. Andrews PW, Kornstein SG, Halberstadt LJ, et al. Blue again: perturbational effects of  
28 antidepressants suggest monoaminergic homeostasis in major depression. *Front Psychol*  
29 2011;2:159. doi: 10.3389/fpsyg.2011.00159  
30  
31  
32  
33 31. Hengartner MP, Angst J, Rossler W. Antidepressant Use Prospectively Relates to a Poorer Long-  
34 Term Outcome of Depression: Results from a Prospective Community Cohort Study over 30  
35 Years. *Psychother Psychosom* 2018;87(3):181-83. doi: 10.1159/000488802  
36  
37  
38  
39 32. Garcia-Gonzalez J, Tansey KE, Hauser J, et al. Pharmacogenetics of antidepressant response: A  
40 polygenic approach. *Prog Neuropsychopharmacol Biol Psychiatry* 2017;75:128-34. doi:  
41 10.1016/j.pnpbp.2017.01.011  
42  
43  
44  
45  
46  
47 33. Senn S. Individual response to treatment: is it a valid assumption? *BMJ* 2004;329(7472):966-68.  
48 doi: DOI 10.1136/bmj.329.7472.966  
49  
50  
51  
52  
53  
54  
55  
56  
57  
58  
59  
60

Table 1. Meta-Analytic results for variance ratios and coefficients of variance ratio

|            | n      |       |         | Variance Ratio (VR) Meta-Analysis |     |                            | r (M, SD) |         | Coefficient of Variance Ratio (CVR) Meta-Analysis |     |                |
|------------|--------|-------|---------|-----------------------------------|-----|----------------------------|-----------|---------|---------------------------------------------------|-----|----------------|
|            | Trials | AD    | Placebo | VR (95% CI)                       | p   | Q(df)                      | AD        | Placebo | CVR (95% CI)                                      | P   | Q (df)         |
| AD all     | 168    | 32517 | 18620   | 1.01 (0.99-1.02)                  | .25 | 116.81 (167)               | .56**     | .53**   | 0.82 (0.80-0.84)                                  | .00 | 242.87 (167)** |
| SSRI       | 89     | 13146 | 9024    | 1.01 (0.99-1.04)                  | .32 | 124.94 (88)** <sup>a</sup> | .56**     | .45**   | 0.83 (0.80-0.86)                                  | .00 | 137.29 (88)**  |
| SNRI       | 52     | 9837  | 7100    | 1.01 (0.99-1.03)                  | .48 | 9.36 (51)                  | .55**     | .57**   | 0.81 (0.78-0.84)                                  | .00 | 69.91 (51)**   |
| Atypical   | 54     | 8780  | 6293    | 1.00 (0.97-1.02)                  | .69 | 17.62 (53)                 | .71**     | .74**   | 0.83 (0.79-0.86)                                  | .00 | 61.53(53)      |
| Tricyclics | 11     | 754   | 771     | 1.04 (0.95-1.14)                  | .40 | 15.80 (10)                 | -.34      | .64*    | 0.65 (0.58-0.72)                                  | .00 | 6.96 (10)      |

Notes:

p (M, SD) is the Pearson correlation of mean pre-post differences in depression (M) and the respective standard deviation (SD). Q(df) is the heterogeneity index for the meta-analysis. \* p < .05, \*\* p < .01, <sup>a</sup>This result was caused by an outlier (Study Dube 2010, NCT00420004), and after removing this study, the heterogeneity index was Q(df=87)=54.54, p = 0.99.

1  
2  
3 **Legend for Figure 1.**  
4

5  
6 Figure 1. Results from simulation analyses (hypothetical variance ratios) for different definitions of  
7  
8  
9  
10  
11  
12  
13  
14  
15  
16  
17  
18  
19  
20  
21  
22  
23  
24  
25  
26  
27  
28  
29  
30  
31  
32  
33  
34  
35  
36  
37  
38  
39  
40  
41  
42  
43  
44  
45  
46  
47  
48  
49  
50  
51  
52  
53  
54  
55  
56  
57  
58  
59  
60  
benefiters (x-axis) and different percentages of benefiters (individual lines with the percentages on  
the right side of the line). The horizontal thick line is the result from our meta-analysis (VR = 1.01),  
the horizontal gray lines correspond with upper and lower limits of the confidence interval of the  
meta-analysis (0.99-1.02).

For peer review only

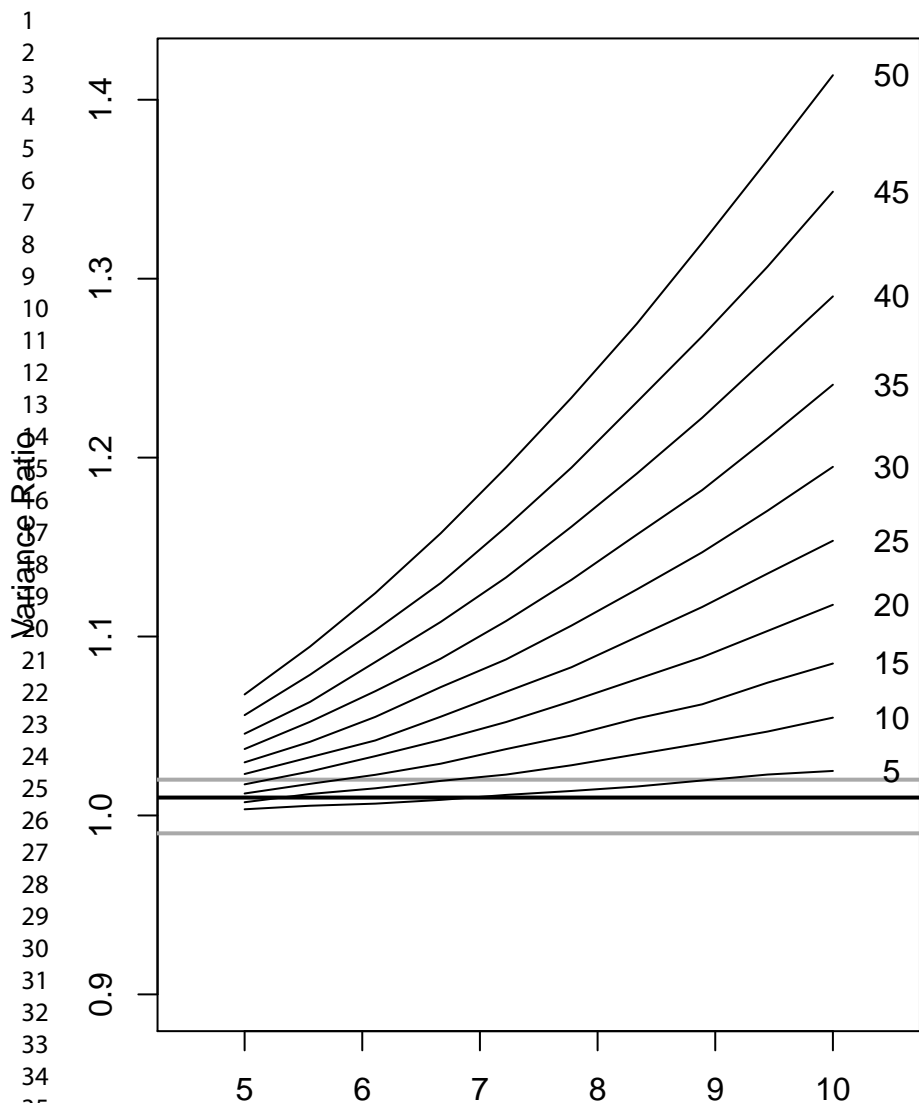

1Supplemental Table - Results for trials where only end of treatment depression scores were available

|            | n      |       |         | Variance Ratio Meta Analysis |     |            | r (M, SD) |         | Coefficient of Variance Ratio Meta-Analysis |     |              |
|------------|--------|-------|---------|------------------------------|-----|------------|-----------|---------|---------------------------------------------|-----|--------------|
|            | Trials | AD    | Placebo | VR (95% CI)                  | p   | Q(df)      | AD        | Placebo | CVR (95% CI)                                | P   | Q (df)       |
| AD all     | 84     | 10879 | 7346    | 0.98 (0.96-1.00)             | .07 | 52.53 (83) | .36**     | .54**   | 1.15 (1.11-1.18)                            | .00 | 92.67 (83)   |
| SSRI       | 40     | 5424  | 3763    | 0.99(0.96-1.03)              | .71 | 28.60 (39) | .63**     | .37*    | 1.13 (1.08-1,17)                            | .00 | 35.23 (39)** |
| SNRI       | 13     | 1440  | 1288    | 0.99 (0.94-1.05)             | .73 | 4.50 (12)  | -.49      | .62*    | 1.15 (1.07-1.24)                            | .00 | 9.82 (12)**  |
| Atypical   | 31     | 4245  | 3092    | 0.97 (0.94-1.00)             | .07 | 12.63 (30) | .43*      | .14     | 1.12 (1.07-1.17)                            | .00 | 34.37 (30)   |
| Tricyclics | 13     | 670   | 643     | 0.93 (0.86-1.01)             | .07 | 9.18(10)   | .09       | .72**   | 1.37 (1.20-1.56)                            | .00 | 15.64 (12)   |

2Notes:

3p (M, SD) is the pearson correlation of mean pre-post differences in depression (M) and the respective standard deviation (SD). Q(df) ist the heterogenity index  
4for the meta-analysis. \* p < .05, \*\* p < .01.



Table 1. Meta-Analytic results for variance ratios and coefficients of variance ratios, individual AD, only studies reporting pre-post-differences of depression

|                 | n      |      |         | Variance Ratio (VR) Meta-Analysis |     |                           | r (M, SD) |         | Coefficient of Variance Ratio (CVR) Meta-Analysis |     |              |
|-----------------|--------|------|---------|-----------------------------------|-----|---------------------------|-----------|---------|---------------------------------------------------|-----|--------------|
|                 | Trials | AD   | Placebo | VR (95% CI)                       | p   | Q(df)                     | AD        | Placebo | CVR (95% CI)                                      | P   | Q (df)       |
| Agomelatine     | 0      | -    | -       | -                                 | -   | -                         | -         | -       | -                                                 | -   | -            |
| Amitriptyline   | 11     | 754  | 771     | 1.04 (0.95-1.14)                  | .40 | 15.80 (10)                | -.34      | .64*    | 0.65(0.58-0.72)                                   | .00 | 6.96 (10)    |
| Bupropion       | 13     | 2095 | 1887    | 0.99 (0.94-1.03)                  | .99 | 2.57 (12)                 | .89**     | .87**   | 0.88 (0.82-0.94)                                  | .00 | 7.70 (12)    |
| Citalopram      | 11     | 1819 | 1335    | 1.02 (0.97-1.07)                  | .50 | 4.35 (10)                 | .54**     | .71*    | 0.85 (0.79-0.92)                                  | .00 | 4.83 (10)    |
| Clomipramine    | 0      | -    | -       | -                                 | -   | -                         | -         | -       | -                                                 | -   | -            |
| Desvenlafaxine  | 7      | 2124 | 1241    | 1.00 (0.95-1.05)                  | .91 | 1.17 (6)                  | -.05      | -.03    | 0.83 (0.77-0.89)                                  | .00 | 1.33 (6)     |
| Duloxetine      | 20     | 2953 | 2371    | 1.01 (0.97-1.05)                  | .66 | 1.81 (19)                 | .61**     | .73**   | 0.76 (0.71-0.81)                                  | .00 | 25.63 (19)   |
| Escitalopram    | 16     | 2749 | 2114    | 1.06 (0.95-1.19)                  | .28 | 74.54 (15)** <sup>a</sup> | .65**     | .05     | 0.90 (0.79-1.02)                                  | .11 | 55.82 (15)** |
| Fluoxetine      | 18     | 2765 | 1991    | 1.00 (0.96-1.05)                  | .95 | 6.96 (17)                 | .60**     | .71**   | 0.85 (0.78-0.92)                                  | .00 | 20.58(17)    |
| Fluvoxamine     | 0      | -    | -       | -                                 | -   | -                         | -         | -       | -                                                 | -   | -            |
| Levomilnacipran | 5      | 1566 | 1032    | 1.03 (0.97-1.09)                  | .31 | 2.91 (4)                  | .20       | .45     | 0.83 (0.74-0.92)                                  | .00 | 6.02 (4)     |
| Milnacipran     | 0      | -    | -       | -                                 | -   | -                         | -         | -       | -                                                 | -   | -            |
| Mirtazapine     | 10     | 624  | 466     | 1.00 (0.91-1.09)                  | .96 | 8.74 (9)                  | .52       | .35     | 0.72 (0.63-0.83)                                  | .00 | 10.91 (9)    |
| Nefazodone      | 9      | 767  | 528     | 1.01 (0.97-1.09)                  | .90 | 0.34 (8)                  | .27       | -.29    | 0.80 (0.71-0.91)                                  | .00 | 5.09 (8)     |
| Paroxetine      | 37     | 4233 | 3333    | 1.00 (0.97-1.04)                  | .89 | 11.27 (36)                | .28       | .26     | 0.82 (0.78-0.86)                                  | .00 | 41.51 (36)   |
| Reboxetine      | 6      | 1035 | 944     | 0.99 (0.93-1.05)                  | .69 | 0.45 (5)                  | .51       | .66     | 0.92 (0.79-1.07)                                  | .28 | 12.10 (5)*   |
| Sertraline      | 15     | 1534 | 1374    | 0.98 (0.90-1.06)                  | .57 | 27.03 (14)                | .75**     | .77**   | 0.77 (0.71-0.83)                                  | .00 | 11.68 (14)   |
| Trazodone       | 0      | -    | -       | -                                 | -   | -                         | -         | -       | -                                                 | -   | -            |

|              | n           |      |      | Variance Ratio (VR) Meta-Analysis |                  |           | r (M, SD) |       | Coefficient of Variance Ratio (CVR) Meta-Analysis |                  |             |
|--------------|-------------|------|------|-----------------------------------|------------------|-----------|-----------|-------|---------------------------------------------------|------------------|-------------|
|              | Venlafaxine | 15   | 2159 | 1672                              | 1.01 (0.96-1.06) | .74       | 2.00 (14) | .42   | .22                                               | 0.83 (0.75-0.85) | .00         |
| Vilazodone   | 5           | 1360 | 1064 | 0.99 (0.93-1.05)                  | .72              | 1.07 (4)  | .55       | .28   | 0.81 (0.73-0.90)                                  | .00              | 4.96 (4)    |
| Vortioxetine | 14          | 3562 | 2098 | 1.00 (0.96-1.04)                  | .99              | 0.41 (13) | .32       | .79** | 0.81 (0.76-0.88)                                  | .00              | 23.04 (13)* |

## Notes:

r (M, SD) is the Pearson correlation coefficient of mean pre-post differences in depression (M) and the respective standard deviation (SD). Q(df) is the heterogeneity index of the meta-analysis. In case of AD without trials that reported pre-post differences, the results for the post-values of depression scores also resulted in VR  $\approx$  1.00 (Agomelatine: VR = 0.96, CI 0.92-1.01; Fluvoxamine VR = 0.99, CI 0.88-1.12; Trazodone: VR = 0.96, CI 0.88-1.06. For Clomipramine and Milnacipran, no placebo-controlled trials were available.

\* p < .05, \*\* p < .01

<sup>a</sup>This result was caused by an outlier (Study Dube 2010, NCT00420004), and after removing this study, the heterogeneity index was Q(df=14)=7.36, p = 0.92.

# BMJ Open

## What are the chances for personalized treatment with antidepressants? Detection of patient by treatment interaction with a variance ratio meta-analysis

|                                 |                                                                                                                                                                                                                                                                                                                                                                |
|---------------------------------|----------------------------------------------------------------------------------------------------------------------------------------------------------------------------------------------------------------------------------------------------------------------------------------------------------------------------------------------------------------|
| Journal:                        | <i>BMJ Open</i>                                                                                                                                                                                                                                                                                                                                                |
| Manuscript ID                   | bmjopen-2019-034816.R1                                                                                                                                                                                                                                                                                                                                         |
| Article Type:                   | Original research                                                                                                                                                                                                                                                                                                                                              |
| Date Submitted by the Author:   | 27-Nov-2019                                                                                                                                                                                                                                                                                                                                                    |
| Complete List of Authors:       | Plöderl, Martin; Christian Doppler Clinic, Paracelsus Medical University, Dept. of Clinical Psychology and Dept. for Crisis Intervention and Suicide Prevention, University Clinic for Psychiatry, Psychotherapy, and Psychosomatics<br>Hengartner, Michael; Zurich University of Applied Sciences/ZHAW, Section for Clinical Psychology and Health Psychology |
| <b>Primary Subject Heading</b>: | Patient-centred medicine                                                                                                                                                                                                                                                                                                                                       |
| Secondary Subject Heading:      | Mental health                                                                                                                                                                                                                                                                                                                                                  |
| Keywords:                       | Depression & mood disorders < PSYCHIATRY, STATISTICS & RESEARCH METHODS, PSYCHIATRY                                                                                                                                                                                                                                                                            |
|                                 |                                                                                                                                                                                                                                                                                                                                                                |

SCHOLARONE™  
Manuscripts

1  
2  
3 ***What are the chances for personalized treatment with antidepressants?***  
4 ***Detection of patient by treatment interaction with a variance ratio***  
5 ***meta-analysis***  
6  
7  
8

9 Martin Plöderl<sup>1\*</sup>, Michael P. Hengartner<sup>2</sup>

10  
11  
12  
13  
14 <sup>1</sup> Department of Crisis Intervention and Suicide Prevention/Christian Doppler Clinic, Paracelsus  
15 Medical University, Salzburg, Austria.

16  
17  
18 <sup>2</sup> Department of Applied Psychology, Zurich University of Applied Sciences, Zurich, Switzerland.  
19  
20  
21  
22  
23  
24

25 **Short Title:** Personalized antidepressants treatment

26 **Word count:** 3075  
27  
28  
29  
30  
31

32 **\*Corresponding Author**

33 Martin Plöderl PhD

34 Dept. of Crisis Intervention and Suicide Prevention

35 Christian Doppler Klinik,

36 Paracelsus Medical University,

37 Ignaz Harrer-Straße 79

38 A-5020 Salzburg

39 AUSTRIA

40 Phone: +43-5-7255-56679

41 Fax: +43-5-7255-4344

42 E-mail: [M.Ploederl@salk.at](mailto:M.Ploederl@salk.at)  
43  
44  
45  
46  
47  
48  
49  
50  
51  
52  
53  
54  
55  
56  
57  
58  
59  
60

## ABSTRACT

### Objectives

To investigate if the treatment effect of antidepressants in patients with depression substantially varies in each patient (patient by treatment interaction or treatment heterogeneity), a necessary but largely unexplored prerequisite of personalized antidepressant treatment.

### Design

Meta-analytic variance-comparison of treatment-outcome between drug arms and placebo arms of clinical trials, based on the assumption that patient by treatment interaction should lead to larger variances in drug arms than placebo arms. To put the results into context, we run simple simulations, assuming different definitions and rates of those who respond especially well to antidepressants.

### Data sources

163 randomized, placebo-controlled trials (51,396 patients) with complete results for pre-post differences, selected from a recently published systematic review.

### Analysis

Variance ratios (VR) and coefficients of variance ratios (CVR) of individual trials were meta-analytically combined. The analysis was repeated for classes of antidepressants and specific antidepressants.

### Results

Variance ratios (VR = 1.01, CI 0.99-1.02) and coefficient of variance ratios (CVR = 0.82, CI 0.80-0.84) of the antidepressant-treatment arms were comparable or smaller than in placebo-arms. Similar results were observed for classes of antidepressants and for specific antidepressants. Our simulation

1  
2  
3 analysis confirmed that equal variance ratios can only be obtained if they are not more than a few  
4  
5 patients who respond slightly above average.  
6  
7

## 8 **Conclusions**

9

10  
11 The lack of increased treatment-outcome variance in the antidepressants versus placebo groups in  
12  
13 RCT indicates that no or only very small subgroups of patients respond particularly well to  
14  
15 antidepressants. Thus, the scope for personalized treatment with antidepressants seems to be  
16  
17 limited.  
18  
19  
20  
21  
22  
23

24 **Keywords:** antidepressants, personalized medicine, treatment heterogeneity, variance ratio, meta-  
25  
26 analysis  
27  
28  
29  
30  
31  
32  
33  
34  
35  
36  
37  
38  
39  
40  
41  
42  
43  
44  
45  
46  
47  
48  
49  
50  
51  
52  
53  
54  
55  
56  
57  
58  
59  
60

## STRENGTHS AND LIMITATIONS OF THIS STUDY

- For the first time, the amount of patient by treatment interaction (treatment heterogeneity), a necessary prerequisite for personalized medicine, is estimated for the pharmacological treatment of depression with antidepressants.
- The data-base is from a systematic review of published and unpublished studies and is one of the largest so far, resulting in precise estimations of the main outcomes.
- The study results are important to inform further attempts in personalized (precision) medicine in psychiatry.
- As with all clinical trials, it remains an open question if our results can be replicated in real-world settings, for example among psychiatric inpatients with very severe depression.

## INTRODUCTION

Personalized or precision medicine, i.e., applying medical interventions only to those patients known to benefit especially well to the intervention (henceforth termed “benefiters”), is important to increase benefits from treatment and to decrease harms. For example, if a drug with severe side effects is very effective in some patients with a specific genotype, it is crucial to know about these benefiters, because for all other patients, the risk-benefit ratio would be unfavorable. Similarly, if a drug is found to have only modest efficacy across all patients but notable side-effects, then it would be important to know if there are patients (e.g., those defined via a specific biomarker) who are benefiters. The latter example corresponds with the pharmacological treatment of major depression, because the average efficacy of antidepressants (AD) is modest, corresponding to, on average, only about 2 points difference on the Hamilton Depression Rating Scale (HDRS) between AD groups and placebo in randomized controlled short-term trials (RCT).<sup>1-5</sup> Put differently, according to our most recent estimate, there is about 88% overlap in distribution of depression scores between antidepressants and placebo at the end of acute treatment.<sup>2</sup>

Despite substantial research efforts, no predictors of treatment success with AD were found that were robust and reliable enough for use in clinical practice.<sup>6-9</sup> Thus, much of the variance of the treatment outcome remains unexplained thus far. Sources of outcome variation include variation between treatment arms (indicating that group means differ due to efficacy of treatments, e.g., AD versus placebo), variation between patients (indicating that the outcome differs from patient to patient, independent of the treatment received), variation within patients (indicating that the outcome for the same patient differs over time due to random symptom fluctuations), and patient-by-treatment interactions (indicating that treatment effects vary from patient to patient).<sup>10</sup> The quest for precision psychiatry, in this case personalized AD treatment, assumes that specific patients benefit more from AD than others, i.e., assumes that there is a patient-by-treatment interaction. Ideally, this can also be explained by a plausible causal mechanism, e.g. inter-individual differences in



1  
2  
3 monoamine function. Investing research efforts in personalized medicine only makes sense if there  
4 truly is a patient-by-drug interaction that explains some variance in the treatment outcome.  
5

6  
7 Although the field is mostly enthusiastic about personalized medicine or precision psychiatry,<sup>11</sup>  
8  
9 experts from various fields now start to dampen expectations and caution that  
10  
11 personalized/precision medicine may fall short of expectations.<sup>12-14</sup>  
12  
13  
14

15 Thus, we must remain mindful that there might be no notable subgroup of true AD benefiter  
16 and that the modest average treatment effect is the best we can hope for.<sup>15</sup> We further need to  
17 acknowledge that RCT are inherently limited to demonstrating patient-by-treatment interactions.<sup>10</sup>  
18  
19 To identify patient-by-treatment interactions, repeated period cross-over trials are necessary, but  
20  
21 these are hardly feasible with common AD due to delayed onset of therapeutic effect and relatively  
22  
23 high rates of spontaneous remission. The most common trial design is the simple parallel-group trial,  
24  
25 where patients are randomized to either AD or placebo. However, these trials can only identify mean  
26  
27 differences between treatment arms (i.e., efficacy), whereas variation between patients, within  
28  
29 patients, as well as patient-by-treatment interactions are part of the error term. Nevertheless, if  
30  
31 patient-by-treatment interaction effects are present, then the variance in the treatment outcome  
32  
33 should be increased in the drug group relative to the placebo group, because no comparable drug-  
34  
35 by-patient interaction is present in the placebo group.<sup>10 16 17</sup> Thus, results from RCT can inform  
36  
37 indirectly if there might be subgroups of benefiter.  
38  
39  
40  
41  
42  
43  
44

45 The goal of this meta-analysis was to examine whether the outcome-variances between AD  
46 and placebo differ, in order to gauge the potential of personalized/precision psychiatry for treatment  
47 with AD.  
48  
49  
50  
51  
52  
53  
54  
55  
56  
57  
58  
59  
60

## METHODS

### Data

Our analysis was based on short-term RCT of AD for patients with unipolar major depression, reported in the most recent systematic review.<sup>18</sup> The authors of this comprehensive study made the data available in a public repository <https://data.mendeley.com/datasets/83rthbp8ys/2>. This included 522 trials (with 21 different AD), of which 254 trials were suitable for further analysis, i.e., contained information about the outcome and also included a placebo-arm. Where trials had multiple treatment arms with different dosages of AD, these arms were aggregated. Where trials compared different AD, the data of these arms were aggregated to only have one value for the drugs in these trials, similar as in a previous publication.<sup>16</sup> Additionally, we recorded different AD by their class (SNRI, SSRI, atypical AD, and tricyclic AD). For 169 (67%) of studies, the pre-post mean reduction of depression scores (M) and the related standard deviations (SD) were available, and only the analysis for these studies are reported here. Analysis for the 85 studies (33%) where only the mean value and standard deviation of the post-treatment depression scores were available are reported in the online supplementary table 1 (<https://osf.io/98kex/files/>). Several additional variables were created for sensitivity analysis (see below).

### Patient and public involvement statement

This research was done without patient involvement. Patients were not invited to comment on the study design and were not consulted to develop patient relevant outcomes or interpret the results. Patients were not invited to contribute to the writing or editing of this document for readability or accuracy.

## Statistical analysis

### Meta-analysis

We calculated the variance ratio (VR) for each RCT and aggregated them by means of a random effect meta-analysis according to the procedure suggested by Winkelbeiner et al.,<sup>16</sup> see <https://osf.io/qarvs/files/>, using the metafor package in R. Because the pre-post-differences were significantly associated with their SD, we repeated the analysis using the coefficient of the variance ratio (CVR). This removes the effect of expected changes in the standard deviation due to changes in the mean.<sup>19</sup> A VR of 1.00 suggest equal variance of AD and placebo. If the VR exceeds 1, then the variance of the AD group is larger than in the placebo group. If the CVR exceeds one, than the increase of variance with increasing pre-post-differences is stronger in the AD than in the placebo arms. Sensitivity analysis included meta-regression models with the assessment instruments, year of publication, type of publication (published vs. unpublished), sample size, and drop-out rates.

### Simulation analysis

To bring our results into context, we also ran simulation analysis with different definitions and probabilities for benefiteres. We based these simulations on an efficacy of 2 points mean-difference between AD and placebo groups, as reported in a meta-analysis on the same dataset for trials using the HDRS-17 instrument.<sup>5</sup> We assumed a standard deviation of SD=8 and a mean difference between pre-and post-depression-scores of 11 points in the AD group (based on rounded means of these values observed in our data-set). We used different cut-offs to define patients as benefiteres, ranging from 5 to 10 points superior treatment outcome with the HDRS-17, and a proportion of 5 to 50% in the AD group vs. 0% in the placebo group. To simulate placebo groups, we sampled from a normal distribution with the above parameters for the placebo group (M = 9, SD = 8, and 5,000,000

1  
2  
3 samples). We used a similar sampling procedure for the AD-group, but created benefitters by adding  
4  
5 necessary HDRS responder points to an assumed fraction of the sample, and adding as many points  
6  
7 to the rest of the sample to end up with the overall efficacy of 2 HDRS points.

8  
9 The R-code and data of this publication is available online (<https://osf.io/98kex/files/>).

## 11 12 13 14 15 16 17 18 **RESULTS**

### 19 20 21 **Meta-analysis**

22  
23 Across all AD, the variance ratio was almost perfectly 1.00 with a narrow confidence interval (VR =  
24  
25 1.01, 95%CI = 0.99 – 1.02). This means that the variances in the AD and placebo groups are identical  
26  
27 (Table 1). Similar findings were found for all classes of AD (Table 1) and for each individual drug  
28  
29 (online supplementary table2, <https://osf.io/98kex/files/>). There was no significant sign of  
30  
31 heterogeneity in the meta-analyses, except for SSRIs. A closer inspection revealed that this resulted  
32  
33 from a single outlier (see footnote in Table 1).

34  
35  
36  
37 ----- Insert Table 1 around here -----  
38

39  
40 For the coefficient of variance ratio, results indicated that the increase of variance with increasing  
41  
42 pre-post differences is less strong in AD than in placebo arms (CVR = 0.82, 95%CI = 0.80-0.84).

43  
44 Comparable results were found for all classes of AD and individual drugs (Table 1). The heterogeneity  
45  
46 was statistically significant in nearly all meta-analyses of the CVR.

47  
48 In the sensitivity analysis, the meta-regression models could not detect statistically significant effects  
49  
50 for year of publication, type of publication, measurement-instruments, and sample size (see  
51  
52 <https://osf.io/98kex/files/>). However, there was a small but statistically significant effect of the drop-  
53  
54 out rates in drug-arms and the VRs. With increasing drop-out rates, the VRs slightly increased (p <  
55  
56  
57  
58 .04).

## Simulation analysis

As shown in Figure 1, most benefiter assumptions lead to VRs much different from those we observed in our study.

----- Insert Figure 1 around here -----

However, for liberal definitions of benefitters and low rates of these benefitters, the VRs can indeed be small. For example, if there are 10% benefitters, as defined with 6 HDRS points difference to average placebo response, the VR is within the confidence interval of our main finding (0.99-1.02).

## DISCUSSION

We found nearly identical treatment outcome variances for AD arms compared to placebo in RCT for the acute treatment of major depression in a large database, as indicated by variance ratios almost perfectly being  $VR = 1$ . The simplest explanation for the finding of similar variances is that there are constant treatment effects and no treatment heterogeneity, i.e. no patient-by-treatment interaction effects and no specific subgroups of patients who respond particularly well to the treatment.<sup>20</sup>

Alternatively, such a subgroup of benefitters would be very small ( $\leq 10\%$ ) and the threshold to classify someone as benefiter would be low ( $\leq 6$  HDRS points difference to average placebo response). To put this in context, according to anchor-based linkage studies, at least 6 points on the HDRS are necessary for a global impression of “minimally improved”.<sup>21 22</sup> Consequently, the search for meaningful predictors of relative treatment response (compared to placebo) will probably fail or will at least be very difficult due to the small subgroup of weak benefitters. Therefore, the mean effect size estimate from parallel-group RCT remains the best guess for predicting treatment outcome for an individual patient. Furthermore, the results for the coefficient of variance indicated that the

1  
2  
3 increase of variance associated with increasing larger pre-post-differences was stronger in the  
4 placebo than the AD groups. There is no immediately plausible explanation for this finding, given that  
5  
6 baseline severity does not predict differential treatment effects.<sup>23-25</sup>  
7  
8  
9

10  
11  
12  
13 Our findings are in line with Senn,<sup>12</sup> who argued that exploratory post-hoc delineation of putative  
14  
15 benefitters, such as the “true benefitters” suggested by Thase *et al.*,<sup>26</sup> are simply statistical artefacts  
16  
17 due to random symptom fluctuations and measurement error (see also Hengartner<sup>15</sup>). Our findings  
18  
19 also replicate the findings for antipsychotics in the acute treatment of schizophrenia,<sup>16</sup> and several  
20  
21 treatments in a review of various medical interventions.<sup>17</sup> Together, these studies indeed suggest  
22  
23 that the promises of precision medicine may remain elusive and that the scope for personalized  
24  
25 medicine might be smaller than previously hoped for.<sup>12 13</sup> Given the high expectations placed in  
26  
27 biomarker-based precision medicine, such findings will probably cause disbelief and reluctance in  
28  
29 many advocates of this enthusiastic movement. In anticipation of such critique, we would like to  
30  
31 address two objections that are likely to be submitted in response to this paper.  
32  
33  
34

35  
36 First, as recently stressed by biostatistics professor Dr. Frank Harrell, to assume that there is  
37  
38 treatment heterogeneity (i.e. significant patient-by-treatment interaction) when the average  
39  
40 treatment effect is close to zero (which is the case with AD), would imply that there must be a large  
41  
42 subgroup of patients where the treatment causes significant harm.<sup>27</sup> Although it has been suggested  
43  
44 that AD may worsen the long-term outcome of depression in some patients,<sup>28-31</sup> there is no evidence  
45  
46 that they may do harm in a large subgroup of patients in short-term trials. In the absence of  
47  
48 consistent biologically-informed patient-specific treatment effects, our best treatment estimate for  
49  
50 AD thus remains the average drug effect relative to placebo.<sup>27</sup>  
51  
52  
53

54  
55 Second, and closely related to the above argument, even after decades of massive research efforts  
56  
57 there is no evidence of robust neurobiological and genetic predictors of differential treatment  
58  
59 response in depression.<sup>6-9 32</sup> Biostatistics professor Dr. Stephen Senn once stated: „Unless patient by  
60

1  
2  
3 treatment interaction exists, it is pointless looking for gene by treatment interactions".<sup>33</sup> Thus, calling  
4  
5 for more genetic and neurobiological research into differential treatment effects clearly conflicts  
6  
7 with the current literature and will most likely fail to yield the hoped-for results.  
8  
9

10  
11  
12  
13 We acknowledge the following major limitation: as Cortés *et al.*<sup>17</sup> describe in their paper, equal  
14  
15 variances are no definite proof for a lack of patient-by-treatment interactions. They hypothetically  
16  
17 describe a situation that leads to equal variances in the treatment and in the control condition and  
18  
19 with patient-by-treatment interactions, but this situation is highly unlikely. Furthermore, VRs of 1  
20  
21 are, theoretically, also possible with a small fraction of "super-responders" and a specific response  
22  
23 for all others, as highlighted in a vivid Twitter-Discussion of our paper  
24  
25 ([https://twitter.com/Martin\\_Ploederl/status/1188006207497363457](https://twitter.com/Martin_Ploederl/status/1188006207497363457)). It can indeed be debated  
26  
27 what assumption is more plausible: a constant treatment effect, a hypothetical fraction of super-  
28  
29 responders, or other highly specific premises. However, a small fraction of super-responders would  
30  
31 obviously lead to non-normal distributions with notable peaks at very low-levels of depression  
32  
33 scores. This was not observed so far, to our knowledge,<sup>26</sup> but could be further investigated with  
34  
35 patient level data. Moreover, VRs would increase for a wide range of scenarios with varying fractions  
36  
37 of benefiteres and varying definitions of "benefiteres."  
38  
39  
40  
41  
42

43 Another potential problem may be, as one reviewer pointed out, that the VRs did not vary  
44  
45 much across trials, as indicated by the Q statistics, and also by the low  $I^2$  statistics. However, the  
46  
47 main results remained the same for different estimators of heterogeneity, unweighted results, or  
48  
49 with the Knapp and Hartung adjustment (see online supplementary table 3). Furthermore, by  
50  
51 manually increasing the value of the heterogeneity, results remained comparable. Presumably, the  
52  
53 low between-trial heterogeneity was caused by insufficient randomization of trials, or due to narrow  
54  
55 and selective inclusion criteria for trial participants.<sup>34</sup>  
56  
57  
58  
59  
60

1  
2  
3 In conclusion, the results of our meta-analysis suggest that there is no or at best a very small patient-  
4  
5 by-treatment interaction. The lack of increased outcome-variance in the AD vs. placebo groups in  
6  
7 parallel-group RCT indicates that no specific subgroup of patients may respond particularly well to  
8  
9 AD. Thus, with the AD currently available, the scope for personalized AD treatments is probably  
10  
11 limited and it is unlikely that precision psychiatry will succeed in finding clinical or biological  
12  
13 predictors of differential treatment response that would account for a therapeutic effect that goes  
14  
15 beyond a minimal clinical improvement.  
16  
17  
18  
19  
20  
21  
22  
23  
24  
25  
26  
27  
28  
29  
30  
31  
32  
33  
34  
35  
36  
37  
38  
39  
40  
41  
42  
43  
44  
45  
46  
47  
48  
49  
50  
51  
52  
53  
54  
55  
56  
57  
58  
59  
60

For peer review only



## STATEMENTS

### Acknowledgements

We thank Cipriani et al.<sup>18</sup> and Winkelbeiner et al.<sup>16</sup> for making the data and the R-code publicly available.

### Contributors

MP and MPH were responsible for the conception and design of the study, interpretation of data, and drafting and revising the manuscript. MP performed the meta-analysis and simulation analysis.

All authors had had full access to all the data and take responsibility for the integrity of the data and the accuracy of the data analysis.

### Ethical approval

No ethical approval is required since our study is a secondary analysis.

### Transparency and data-sharing statement

The lead author affirms that this manuscript is an honest, accurate, and transparent account of the study being reported; that no important aspects of the study have been omitted. The data, statistical code, and supplementary tables are available online (<https://osf.io/98kex/files/>).

### Role of funding source

This research received no specific grant from any funding agency, commercial or not-for-profit sectors. The authors do not have any financial conflicts of interest. MP works in a public psychiatric hospital, where the treatment with antidepressants is a common practice, potentially causing conflicts of interest. For this reason, the research was done in his leisure time.

## REFERENCES

1. Hengartner MP. What is the threshold for a clinical minimally important drug effect? *BMJ Evid Based Med* 2018 doi: 10.1136/bmjebm-2018-111056 [published Online First: 2018/08/30]
2. Hengartner MP, Plöderl M. Statistically significant antidepressant-placebo differences on subjective symptom-rating scales do not prove that the drugs work: Effect size and method bias matter! *Frontiers in Psychiatry* 2018;9:517. doi: 10.3389/fpsy.2018.00517
3. Jakobsen JC, Katakam KK, Schou A, et al. Selective serotonin reuptake inhibitors versus placebo in patients with major depressive disorder. A systematic review with meta-analysis and Trial Sequential Analysis. *BMC Psychiatry* 2017;17(1):58. doi: 10.1186/s12888-016-1173-2 [published Online First: 2017/02/10]
4. Moncrieff J, Kirsch I. Efficacy of antidepressants in adults. *Bmj* 2005;331(7509):155-7. doi: 10.1136/bmj.331.7509.155 [published Online First: 2005/07/16]
5. Munkholm K, Paludan-Muller AS, Boesen K. Considering the methodological limitations in the evidence base of antidepressants for depression: a reanalysis of a network meta-analysis. *BMJ Open* 2019;9(6):e024886. doi: 10.1136/bmjopen-2018-024886
6. Perlman K, Benrimoh D, Israel S, et al. A systematic meta-review of predictors of antidepressant treatment outcome in major depressive disorder. *J Affect Disord* 2019;243:503-15. doi: 10.1016/j.jad.2018.09.067 [published Online First: 2018/10/05]
7. Simon GE, Perlis RH. Personalized medicine for depression: can we match patients with treatments? *Am J Psychiatry* 2010;167(12):1445-55. doi: 10.1176/appi.ajp.2010.09111680 [published Online First: 2010/09/17]
8. Widge AS, Bilge MT, Montana R, et al. Electroencephalographic Biomarkers for Treatment Response Prediction in Major Depressive Illness: A Meta-Analysis. *Am J Psychiatry* 2019;176(1):44-56. doi: 10.1176/appi.ajp.2018.17121358 [published Online First: 2018/10/04]
9. Tansey KE, Guipponi M, Perroud N, et al. Genetic predictors of response to serotonergic and noradrenergic antidepressants in major depressive disorder: a genome-wide analysis of individual-level data and a meta-analysis. *PLoS medicine* 2012;9(10):e1001326. doi: 10.1371/journal.pmed.1001326
10. Senn S. Mastering variation: variance components and personalised medicine. *Stat Med* 2016;35(7):966-77. doi: 10.1002/sim.6739 [published Online First: 2015/09/30]
11. Fernandes BS, Williams LM, Steiner J, et al. The new field of 'precision psychiatry'. *BMC medicine* 2017;15 doi: ARTN 80  
10.1186/s12916-017-0849-x
12. Senn S. Statistical pitfalls of personalized medicine. *Nature* 2018;563(7733):619-21. doi: 10.1038/d41586-018-07535-2 [published Online First: 2018/11/30]
13. Joyner MJ, Paneth N. Promises, promises, and precision medicine. *J Clin Invest* 2019;129(3):946-48. doi: 10.1172/JCI126119
14. Prasad V, Fojo T, Brada M. Precision oncology: origins, optimism, and potential. *Lancet Oncol* 2016;17(2):e81-e86. doi: 10.1016/S1470-2045(15)00620-8
15. Hengartner MP. Scientific debate instead of beef; challenging misleading arguments about the efficacy of antidepressants. *Acta Neuropsychiatr* 2019;31(4):235-36. doi: 10.1017/neu.2019.23
16. Winkelbeiner S, Leucht S, Kane JM, et al. Evaluation of Differences in Individual Treatment Response in Schizophrenia Spectrum Disorders: A Meta-analysis. *JAMA psychiatry* 2019 doi: 10.1001/jamapsychiatry.2019.1530 [published Online First: 2019/06/04]
17. Cortés J, González JA, Medina MN, et al. Does evidence support the high expectations placed in precision medicine? A bibliographic review [version 5; peer review: 1 approved, 2 approved

- with reservations, 3 not approved]. *F1000Research* 2019;7:30. doi: <https://doi.org/10.12688/f1000research.13490.5>
18. Cipriani A, Furukawa TA, Salanti G, et al. Comparative efficacy and acceptability of 21 antidepressant drugs for the acute treatment of adults with major depressive disorder: a systematic review and network meta-analysis. *Lancet* 2018;391(10128):1357-66. doi: 10.1016/S0140-6736(17)32802-7 [published Online First: 2018/02/27]
  19. Nakagawa S, Poulin R, Mengersen K, et al. Meta-analysis of variation: ecological and evolutionary applications and beyond. *Methods Ecol Evol* 2015;6(2):143-52. doi: 10.1111/2041-210x.12309
  20. Cortes J, Gonzalez JA, Medina MN, et al. Does evidence support the high expectations placed in precision medicine? A bibliographic review. *F1000Res* 2018;7:30. doi: 10.12688/f1000research.13490.5
  21. Furukawa TA, Akechi T, Azuma H, et al. Evidence-based guidelines for interpretation of the Hamilton Rating Scale for Depression. *J Clin Psychopharmacol* 2007;27(5):531-4. doi: 10.1097/JCP.0b013e31814f30b1
  22. Leucht S, Fennema H, Engel R, et al. What does the HAMD mean? *J Affect Disord* 2013;148(2-3):243-8. doi: 10.1016/j.jad.2012.12.001
  23. Rabinowitz J, Werbeloff N, Mandel FS, et al. Initial depression severity and response to antidepressants v. placebo: patient-level data analysis from 34 randomised controlled trials. *Br J Psychiatry* 2016;209(5):427-28. doi: 10.1192/bjp.bp.115.173906
  24. Furukawa TA, Maruo K, Noma H, et al. Initial severity of major depression and efficacy of new generation antidepressants: individual participant data meta-analysis. *Acta Psychiatr Scand* 2018;137(6):450-58. doi: 10.1111/acps.12886
  25. Hieronymus F, Lisinski A, Nilsson S, et al. Influence of baseline severity on the effects of SSRIs in depression: an item-based, patient-level post-hoc analysis. *Lancet Psychiat* 2019 doi: 10.1016/S2215-0366(19)30216-0
  26. Thase ME, Larsen KG, Kennedy SH. Assessing the 'true' effect of active antidepressant therapy v. placebo in major depressive disorder: use of a mixture model. *Br J Psychiatry* 2011;199(6):501-7. doi: 10.1192/bjp.bp.111.093336 [published Online First: 2011/12/02]
  27. Harrell FE, Jr. Viewpoints on heterogeneity of treatment effect and precision medicine. *Statistical Thinking*, 2019.
  28. Fava GA, Offidani E. The mechanisms of tolerance in antidepressant action. *Prog Neuropsychopharmacol Biol Psychiatry* 2011;35(7):1593-602. doi: 10.1016/j.pnpbp.2010.07.026
  29. El-Mallakh RS, Gao Y, Jeannie Roberts R. Tardive dysphoria: the role of long term antidepressant use in-inducing chronic depression. *Med Hypotheses* 2011;76(6):769-73. doi: 10.1016/j.mehy.2011.01.020
  30. Andrews PW, Kornstein SG, Halberstadt LJ, et al. Blue again: perturbational effects of antidepressants suggest monoaminergic homeostasis in major depression. *Frontiers in psychology* 2011;2:159. doi: 10.3389/fpsyg.2011.00159
  31. Hengartner MP, Angst J, Rossler W. Antidepressant Use Prospectively Relates to a Poorer Long-Term Outcome of Depression: Results from a Prospective Community Cohort Study over 30 Years. *Psychother Psychosom* 2018;87(3):181-83. doi: 10.1159/000488802 [published Online First: 2018/04/24]
  32. Garcia-Gonzalez J, Tansey KE, Hauser J, et al. Pharmacogenetics of antidepressant response: A polygenic approach. *Prog Neuropsychopharmacol Biol Psychiatry* 2017;75:128-34. doi: 10.1016/j.pnpbp.2017.01.011
  33. Senn S. Individual response to treatment: is it a valid assumption? *Bmj* 2004;329(7472):966-68. doi: DOI 10.1136/bmj.329.7472.966

1  
2  
3 34. Zimmerman M, Clark HL, Multach MD, et al. Have Treatment Studies of Depression Become Even  
4 Less Generalizable? A Review of the Inclusion and Exclusion Criteria Used in Placebo-  
5 Controlled Antidepressant Efficacy Trials Published During the Past 20 Years. *Mayo Clin Proc*  
6 2015;90(9):1180-86. doi: 10.1016/j.mayocp.2015.06.016  
7  
8  
9  
10  
11  
12  
13  
14  
15  
16  
17  
18  
19  
20  
21  
22  
23  
24  
25  
26  
27  
28  
29  
30  
31  
32  
33  
34  
35  
36  
37  
38  
39  
40  
41  
42  
43  
44  
45  
46  
47  
48  
49  
50  
51  
52  
53  
54  
55  
56  
57  
58  
59  
60

For peer review only

Table 1. Meta-Analytic results for variance ratios and coefficients of variance ratio

|            | n      |       |         | Variance Ratio (VR) Meta-Analysis |     |                            | r (M, SD) |         | Coefficient of Variance Ratio (CVR) Meta-Analysis |     |                |
|------------|--------|-------|---------|-----------------------------------|-----|----------------------------|-----------|---------|---------------------------------------------------|-----|----------------|
|            | Trials | AD    | Placebo | VR (95% CI)                       | p   | Q(df)                      | AD        | Placebo | CVR (95% CI)                                      | P   | Q (df)         |
| AD all     | 169    | 32650 | 18746   | 1.01 (0.99-1.02)                  | .33 | 121.74 (168)               | .55**     | .52**   | 0.82 (0.80-0.84)                                  | .00 | 243.53 (168)** |
| SSRI       | 89     | 13146 | 9024    | 1.01 (0.99-1.04)                  | .32 | 124.94 (88)** <sup>a</sup> | .56**     | .45**   | 0.83 (0.80-0.86)                                  | .00 | 137.29 (88)**  |
| SNRI       | 53     | 9970  | 7226    | 1.00 (0.98-1.03)                  | .66 | 14.26 (52)                 | .53**     | .56**   | 0.81 (0.78-0.84)                                  | .00 | 70.37 (52)**   |
| Atypical   | 54     | 8780  | 6293    | 1.00 (0.97-1.02)                  | .69 | 17.62 (53)                 | .71**     | .74**   | 0.83 (0.79-0.86)                                  | .00 | 61.53(53)      |
| Tricyclics | 11     | 754   | 771     | 1.04 (0.95-1.14)                  | .40 | 15.80 (10)                 | -.34      | .64*    | 0.65 (0.58-0.72)                                  | .00 | 6.96 (10)      |

Notes:

p (M, SD) is the Pearson correlation of mean pre-post differences in depression (M) and the respective standard deviation (SD). Q(df) is the heterogeneity index for the meta-analysis. \* p < .05, \*\* p < .01, <sup>a</sup>This result was caused by an outlier (Study Dube 2010, NCT00420004), and after removing this study, the heterogeneity index was Q(df=87)=54.54, p = 0.99.

1  
2  
3 **Legend for Figure 1.**  
4

5  
6 Figure 1. Results from simulation analyses (hypothetical variance ratios) for different definitions of  
7  
8  
9  
10  
11  
12  
13  
14  
15  
16  
17  
18  
19  
20  
21  
22  
23  
24  
25  
26  
27  
28  
29  
30  
31  
32  
33  
34  
35  
36  
37  
38  
39  
40  
41  
42  
43  
44  
45  
46  
47  
48  
49  
50  
51  
52  
53  
54  
55  
56  
57  
58  
59  
60

Figure 1. Results from simulation analyses (hypothetical variance ratios) for different definitions of  
benefiters (x-axis) and different percentages of benefiters (individual lines with the percentages on  
the right side of the line). The horizontal thick line is the result from our meta-analysis (VR = 1.01),  
the horizontal gray lines correspond with upper and lower limits of the confidence interval of the  
meta-analysis (0.99-1.02).

For peer review only

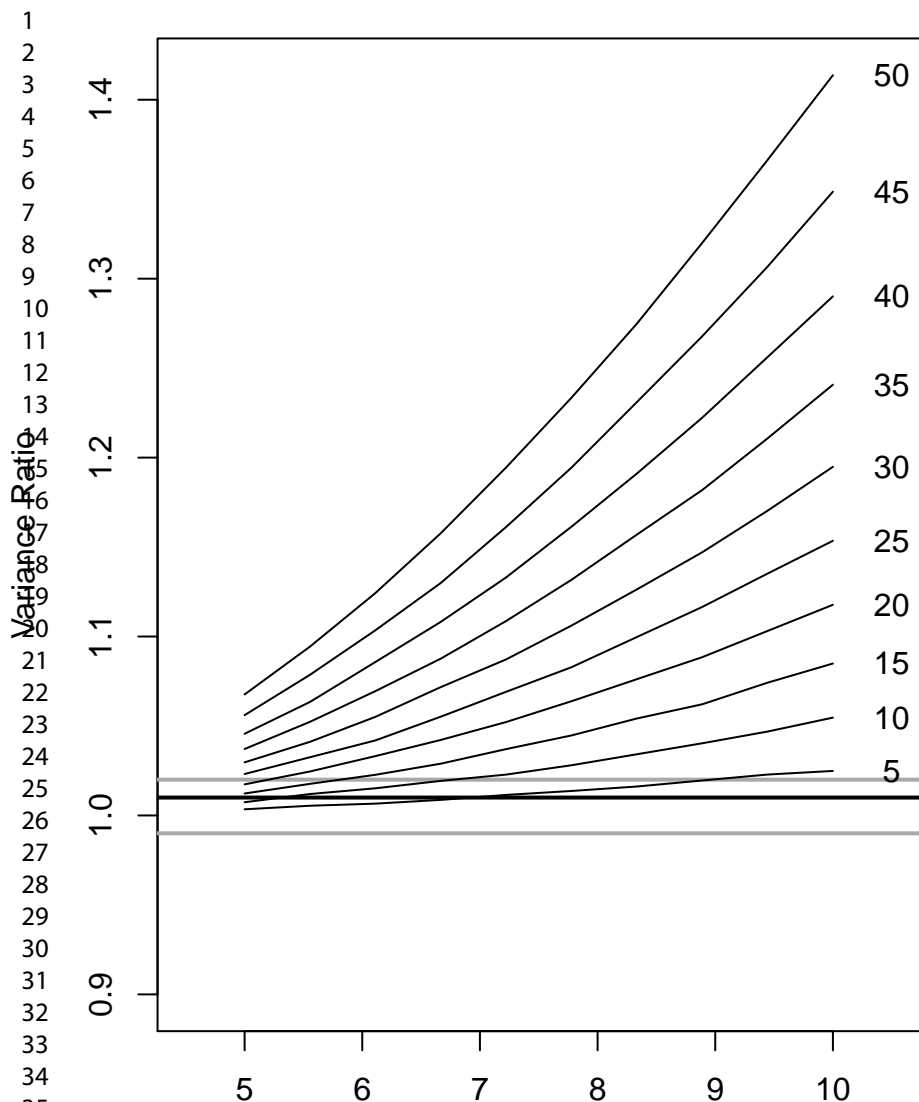

Supplementary Table 1: Results for trials where only end of treatment depression scores were available

|            | n      |       |         | Variance Ratio Meta Analysis |     |            | r (M, SD) |         | Coefficient of Variance Ratio Meta-Analysis |     |              |
|------------|--------|-------|---------|------------------------------|-----|------------|-----------|---------|---------------------------------------------|-----|--------------|
|            | Trials | AD    | Placebo | VR (95% CI)                  | p   | Q(df)      | AD        | Placebo | CVR (95% CI)                                | P   | Q (df)       |
| AD all     | 84     | 10879 | 7346    | 0.98 (0.96-1.00)             | .07 | 52.53 (83) | .36**     | .54**   | 1.15 (1.11-1.18)                            | .00 | 92.67 (83)   |
| SSRI       | 40     | 5424  | 3763    | 0.99(0.96-1.03)              | .71 | 28.60 (39) | .63**     | .37*    | 1.13 (1.08-1,17)                            | .00 | 35.23 (39)** |
| SNRI       | 13     | 1440  | 1288    | 0.99 (0.94-1.05)             | .73 | 4.50 (12)  | -.49      | .62*    | 1.15 (1.07-1.24)                            | .00 | 9.82 (12)**  |
| Atypical   | 31     | 4245  | 3092    | 0.97 (0.94-1.00)             | .07 | 12.63 (30) | .43*      | .14     | 1.12 (1.07-1.17)                            | .00 | 34.37 (30)   |
| Tricyclics | 13     | 670   | 643     | 0.93 (0.86-1.01)             | .07 | 9.18(10)   | .09       | .72**   | 1.37 (1.20-1.56)                            | .00 | 15.64 (12)   |

Notes:

p (M, SD) is the pearson correlation of mean pre-post differences in depression (M) and the respective standard deviation (SD). Q(df) ist the heterogenity index for the meta-analysis. \* p < .05, \*\* p < .01.



Supplementary Table 2: Meta-analytic results for variance ratios and coefficients of variance ratios, individual AD, only studies reporting pre-post-differences

|                 | n      |      |         | Variance Ratio (VR) Meta-Analysis |     |                           | r (M, SD) |         | Coefficient of Variance Ratio (CVR) Meta-Analysis |     |              |
|-----------------|--------|------|---------|-----------------------------------|-----|---------------------------|-----------|---------|---------------------------------------------------|-----|--------------|
|                 | Trials | AD   | Placebo | VR (95% CI)                       | p   | Q(df)                     | AD        | Placebo | CVR (95% CI)                                      | P   | Q (df)       |
| Agomelatine     | 0      | -    | -       | -                                 | -   | -                         | -         | -       | -                                                 | -   | -            |
| Amitriptyline   | 11     | 754  | 771     | 1.04 (0.95-1.14)                  | .40 | 15.80 (10)                | -.34      | .64*    | 0.65(0.58-0.72)                                   | .00 | 6.96 (10)    |
| Bupropion       | 13     | 2095 | 1887    | 0.99 (0.94-1.03)                  | .99 | 2.57 (12)                 | .89**     | .87**   | 0.88 (0.82-0.94)                                  | .00 | 7.70 (12)    |
| Citalopram      | 11     | 1819 | 1335    | 1.02 (0.97-1.07)                  | .50 | 4.35 (10)                 | .54**     | .71*    | 0.85 (0.79-0.92)                                  | .00 | 4.83 (10)    |
| Clomipramine    | 0      | -    | -       | -                                 | -   | -                         | -         | -       | -                                                 | -   | -            |
| Desvenlafaxine  | 7      | 2124 | 1241    | 1.00 (0.95-1.05)                  | .91 | 1.17 (6)                  | -.05      | -.03    | 0.83 (0.77-0.89)                                  | .00 | 1.33 (6)     |
| Duloxetine      | 20     | 2953 | 2371    | 1.01 (0.97-1.05)                  | .66 | 1.81 (19)                 | .61**     | .73**   | 0.76 (0.71-0.81)                                  | .00 | 25.63 (19)   |
| Escitalopram    | 16     | 2749 | 2114    | 1.06 (0.95-1.19)                  | .28 | 74.54 (15)** <sup>a</sup> | .65**     | .05     | 0.90 (0.79-1.02)                                  | .11 | 55.82 (15)** |
| Fluoxetine      | 18     | 2765 | 1991    | 1.00 (0.96-1.05)                  | .95 | 6.96 (17)                 | .60**     | .71**   | 0.85 (0.78-0.92)                                  | .00 | 20.58(17)    |
| Fluvoxamine     | 0      | -    | -       | -                                 | -   | -                         | -         | -       | -                                                 | -   | -            |
| Levomilnacipran | 5      | 1566 | 1032    | 1.03 (0.97-1.09)                  | .31 | 2.91 (4)                  | .20       | .45     | 0.83 (0.74-0.92)                                  | .00 | 6.02 (4)     |
| Milnacipran     | 0      | -    | -       | -                                 | -   | -                         | -         | -       | -                                                 | -   | -            |
| Mirtazapine     | 10     | 624  | 466     | 1.00 (0.91-1.09)                  | .96 | 8.74 (9)                  | .52       | .35     | 0.72 (0.63-0.83)                                  | .00 | 10.91 (9)    |
| Nefazodone      | 9      | 767  | 528     | 1.01 (0.97-1.09)                  | .90 | 0.34 (8)                  | .27       | -.29    | 0.80 (0.71-0.91)                                  | .00 | 5.09 (8)     |
| Paroxetine      | 37     | 4233 | 3333    | 1.00 (0.97-1.04)                  | .89 | 11.27 (36)                | .28       | .26     | 0.82 (0.78-0.86)                                  | .00 | 41.51 (36)   |
| Reboxetine      | 6      | 1035 | 944     | 0.99 (0.93-1.05)                  | .69 | 0.45 (5)                  | .51       | .66     | 0.92 (0.79-1.07)                                  | .28 | 12.10 (5)*   |
| Sertraline      | 15     | 1534 | 1374    | 0.98 (0.90-1.06)                  | .57 | 27.03 (14)                | .75**     | .77**   | 0.77 (0.71-0.83)                                  | .00 | 11.68 (14)   |
| Trazodone       | 0      | -    | -       | -                                 | -   | -                         | -         | -       | -                                                 | -   | -            |

1  
2  
3  
4  
5  
6  
7  
8  
9  
10  
11  
12  
13  
14  
15  
16  
17  
18  
19  
20  
21  
22  
23  
24  
25  
26  
27  
28  
29  
30  
31  
32  
33  
34  
35  
36  
37  
38  
39  
40  
41  
42  
43  
44  
45  
46

|              | n  |      |      | Variance Ratio (VR) Meta-Analysis |     |           | r (M, SD) |       | Coefficient of Variance Ratio (CVR) Meta-Analysis |     |             |
|--------------|----|------|------|-----------------------------------|-----|-----------|-----------|-------|---------------------------------------------------|-----|-------------|
|              |    |      |      |                                   |     |           |           |       |                                                   |     |             |
| Venlafaxine  | 16 | 2292 | 1798 | 0.99 (0.95-1.04)                  | .82 | 6.64 (15) | .36       | .18   | 0.80 (0.75-0.85)                                  | .00 | 11.86 (15)  |
| Vilazodone   | 5  | 1360 | 1064 | 0.99 (0.93-1.05)                  | .72 | 1.07 (4)  | .55       | .28   | 0.81 (0.73-0.90)                                  | .00 | 4.96 (4)    |
| Vortioxetine | 14 | 3562 | 2098 | 1.00 (0.96-1.04)                  | .99 | 0.41 (13) | .32       | .79** | 0.81 (0.76-0.88)                                  | .00 | 23.04 (13)* |

Notes:

r (M, SD) is the Pearson correlation coefficient of mean pre-post differences in depression (M) and the respective standard deviation (SD). Q(df) is the heterogeneity index of the meta-analysis. In case of AD without trials that reported pre-post differences, the results for the post-values of depression scores also resulted in VR ≈ 1.00 (Agomelatine: VR = 0.96, CI 0.92-1.01; Fluvoxamine VR = 0.99, CI 0.88-1.12; Trazodone: VR = 0.96, CI 0.88-1.06. For Clomipramine and Milnacipran, no placebo-controlled trials were available.

\* p < .05, \*\* p < .01

<sup>a</sup>This result was caused by an outlier (Study Dube 2010, NCT00420004), and after removing this study, the heterogeneity index was Q(df=14)=7.36, p = 0.92.

Supplementary Table 3: Different estimations of heterogeneity

|                                                                                             | VR   | CI-<br>lower | CI-<br>upper | I <sup>2</sup> (%) | p   |
|---------------------------------------------------------------------------------------------|------|--------------|--------------|--------------------|-----|
| <b>Estimator of heterogeneity</b>                                                           |      |              |              |                    |     |
| Restricted maximum-likelihood (same as in Winkelbaumer et al., 2019)                        | 1.01 | 0.99         | 1.02         | 0                  | .24 |
| With Knapp and Hartung (KH) adjustment                                                      | 1.01 | 1.00         | 1.02         | 0                  | .25 |
| Sidik-Jonkman (SJ)                                                                          | 1.01 | 0.99         | 1.02         | 32                 | .39 |
| With KH adjustment                                                                          | 1.01 | 1.00         | 1.02         | 32                 | .25 |
| Paule Mandel                                                                                | 1.01 | 0.99         | 1.02         | 0                  | .33 |
| With KH adjustment                                                                          | 1.01 | 1.00         | 1.02         | 0                  | .25 |
| Empirical Bayes                                                                             | 1.01 | 0.99         | 1.02         | 0                  | .33 |
| With KH adjustment                                                                          | 1.01 | 1.00         | 1.02         | 0                  | .25 |
| DerSimonian-Laird                                                                           | 1.01 | 0.99         | 1.02         | 0                  | .33 |
| With KH adjustment                                                                          | 1.01 | 1.00         | 1.02         | 0                  | .25 |
|                                                                                             |      |              |              |                    |     |
| <b>Unweighted results</b><br>(as recommended for tau <sup>2</sup> = 0 by Viechtbauer, 2010) |      |              |              |                    |     |
| Restricted maximum-likelihood (same as in Winkelbaumer et al. 2019)                         | 1.01 | 0.99         | 1.03         | 0                  | .24 |
| Sidik-Jonkman (SJ)                                                                          | 1.01 | 0.99         | 1.03         | 32                 | .30 |
|                                                                                             |      |              |              |                    |     |
| <b>Using manual values for tau<sup>2</sup></b>                                              |      |              |              |                    |     |
| tau <sup>2</sup> =0.0108 (3 times the SJ)                                                   | 1.01 | 0.99         | 1.03         | 59                 | .46 |
| tau <sup>2</sup> =0.036 (10 times the SJ)                                                   | 1.01 | 0.98         | 1.04         | 83                 | .59 |
| tau <sup>2</sup> =0.36 (100 times the SJ)                                                   | 1.01 | 0.92         | 1.11         | 98                 | .83 |
|                                                                                             |      |              |              |                    |     |
