# Supplementary material for: What are the chances for personalised treatment with antidepressants? Detection of patient-by-treatment interaction with a variance ratio meta-analysis
Source: PubMed Central journal article supplement — BMJ Open. 2019 Dec 23;9(12):e034816. doi: 10.1136/bmjopen-2019-034816 (PMC7008413; doi:10.1136/bmjopen-2019-034816), 2019-12-23
Supplement: bmjopen-2019-034816supp001.pdf [file bmjopen-2019-034816supp001.pdf]

Supplementary Table 1: Results for trials where only end of treatment depression scores were available

|            | n      |       |         | Variance Ratio Meta Analysis |     |            | r (M, SD) |         | Coefficient of Variance Ratio Meta-Analysis |     |              |
|------------|--------|-------|---------|------------------------------|-----|------------|-----------|---------|---------------------------------------------|-----|--------------|
|            | Trials | AD    | Placebo | VR (95% CI)                  | p   | Q(df)      | AD        | Placebo | CVR (95% CI)                                | P   | Q (df)       |
| AD all     | 84     | 10879 | 7346    | 0.98 (0.96-1.00)             | .07 | 52.53 (83) | .36**     | .54**   | 1.15 (1.11-1.18)                            | .00 | 92.67 (83)   |
| SSRI       | 40     | 5424  | 3763    | 0.99(0.96-1.03)              | .71 | 28.60 (39) | .63**     | .37*    | 1.13 (1.08-1.17)                            | .00 | 35.23 (39)** |
| SNRI       | 13     | 1440  | 1288    | 0.99 (0.94-1.05)             | .73 | 4.50 (12)  | -.49      | .62*    | 1.15 (1.07-1.24)                            | .00 | 9.82 (12)**  |
| Atypical   | 31     | 4245  | 3092    | 0.97 (0.94-1.00)             | .07 | 12.63 (30) | .43*      | .14     | 1.12 (1.07-1.17)                            | .00 | 34.37 (30)   |
| Tricyclics | 13     | 670   | 643     | 0.93 (0.86-1.01)             | .07 | 9.18(10)   | .09       | .72**   | 1.37 (1.20-1.56)                            | .00 | 15.64 (12)   |

Notes:

p (M, SD) is the pearson correlation of mean pre-post differences in depression (M) and the respective standard deviation (SD). Q(df) ist the heterogeneity index for the meta-analysis. \* p < .05, \*\* p < .01.
