# Supplementary material for: What are the chances for personalised treatment with antidepressants? Detection of patient-by-treatment interaction with a variance ratio meta-analysis
Source: PubMed Central journal article supplement — BMJ Open. 2019 Dec 23;9(12):e034816. doi: 10.1136/bmjopen-2019-034816 (PMC7008413; doi:10.1136/bmjopen-2019-034816), 2019-12-23
Supplement: bmjopen-2019-034816supp002.pdf [file bmjopen-2019-034816supp002.pdf]

Supplementary Table 2: Meta-analytic results for variance ratios and coefficients of variance ratios, individual AD, only studies reporting pre-post-differences

|                 | n      |      |         | Variance Ratio (VR) Meta-Analysis |     |                           | r (M, SD) |         | Coefficient of Variance Ratio (CVR) Meta-Analysis |     |              |
|-----------------|--------|------|---------|-----------------------------------|-----|---------------------------|-----------|---------|---------------------------------------------------|-----|--------------|
|                 | Trials | AD   | Placebo | VR (95% CI)                       | p   | Q(df)                     | AD        | Placebo | CVR (95% CI)                                      | P   | Q (df)       |
| Agomelatine     | 0      | -    | -       | -                                 | -   | -                         | -         | -       | -                                                 | -   | -            |
| Amitriptyline   | 11     | 754  | 771     | 1.04 (0.95-1.14)                  | .40 | 15.80 (10)                | -.34      | .64*    | 0.65(0.58-0.72)                                   | .00 | 6.96 (10)    |
| Bupropion       | 13     | 2095 | 1887    | 0.99 (0.94-1.03)                  | .99 | 2.57 (12)                 | .89**     | .87**   | 0.88 (0.82-0.94)                                  | .00 | 7.70 (12)    |
| Citalopram      | 11     | 1819 | 1335    | 1.02 (0.97-1.07)                  | .50 | 4.35 (10)                 | .54**     | .71*    | 0.85 (0.79-0.92)                                  | .00 | 4.83 (10)    |
| Clomipramine    | 0      | -    | -       | -                                 | -   | -                         | -         | -       | -                                                 | -   | -            |
| Desvenlafaxine  | 7      | 2124 | 1241    | 1.00 (0.95-1.05)                  | .91 | 1.17 (6)                  | -.05      | -.03    | 0.83 (0.77-0.89)                                  | .00 | 1.33 (6)     |
| Duloxetine      | 20     | 2953 | 2371    | 1.01 (0.97-1.05)                  | .66 | 1.81 (19)                 | .61**     | .73**   | 0.76 (0.71-0.81)                                  | .00 | 25.63 (19)   |
| Escitalopram    | 16     | 2749 | 2114    | 1.06 (0.95-1.19)                  | .28 | 74.54 (15)** <sup>a</sup> | .65**     | .05     | 0.90 (0.79-1.02)                                  | .11 | 55.82 (15)** |
| Fluoxetine      | 18     | 2765 | 1991    | 1.00 (0.96-1.05)                  | .95 | 6.96 (17)                 | .60**     | .71**   | 0.85 (0.78-0.92)                                  | .00 | 20.58(17)    |
| Fluvoxamine     | 0      | -    | -       | -                                 | -   | -                         | -         | -       | -                                                 | -   | -            |
| Levomilnacipran | 5      | 1566 | 1032    | 1.03 (0.97-1.09)                  | .31 | 2.91 (4)                  | .20       | .45     | 0.83 (0.74-0.92)                                  | .00 | 6.02 (4)     |
| Milnacipran     | 0      | -    | -       | -                                 | -   | -                         | -         | -       | -                                                 | -   | -            |
| Mirtazapine     | 10     | 624  | 466     | 1.00 (0.91-1.09)                  | .96 | 8.74 (9)                  | .52       | .35     | 0.72 (0.63-0.83)                                  | .00 | 10.91 (9)    |
| Nefazodone      | 9      | 767  | 528     | 1.01 (0.97-1.09)                  | .90 | 0.34 (8)                  | .27       | -.29    | 0.80 (0.71-0.91)                                  | .00 | 5.09 (8)     |
| Paroxetine      | 37     | 4233 | 3333    | 1.00 (0.97-1.04)                  | .89 | 11.27 (36)                | .28       | .26     | 0.82 (0.78-0.86)                                  | .00 | 41.51 (36)   |
| Reboxetine      | 6      | 1035 | 944     | 0.99 (0.93-1.05)                  | .69 | 0.45 (5)                  | .51       | .66     | 0.92 (0.79-1.07)                                  | .28 | 12.10 (5)*   |
| Sertraline      | 15     | 1534 | 1374    | 0.98 (0.90-1.06)                  | .57 | 27.03 (14)                | .75**     | .77**   | 0.77 (0.71-0.83)                                  | .00 | 11.68 (14)   |
| Trazodone       | 0      | -    | -       | -                                 | -   | -                         | -         | -       | -                                                 | -   | -            |

|              | n  |      |      | Variance Ratio (VR) Meta-Analysis |     |           | r (M, SD) |       | Coefficient of Variance Ratio (CVR) Meta-Analysis |     |             |
|--------------|----|------|------|-----------------------------------|-----|-----------|-----------|-------|---------------------------------------------------|-----|-------------|
|              |    |      |      |                                   |     |           |           |       |                                                   |     |             |
| Venlafaxine  | 16 | 2292 | 1798 | 0.99 (0.95-1.04)                  | .82 | 6.64 (15) | .36       | .18   | 0.80 (0.75-0.85)                                  | .00 | 11.86 (15)  |
| Vilazodone   | 5  | 1360 | 1064 | 0.99 (0.93-1.05)                  | .72 | 1.07 (4)  | .55       | .28   | 0.81 (0.73-0.90)                                  | .00 | 4.96 (4)    |
| Vortioxetine | 14 | 3562 | 2098 | 1.00 (0.96-1.04)                  | .99 | 0.41 (13) | .32       | .79** | 0.81 (0.76-0.88)                                  | .00 | 23.04 (13)* |

## Notes:

r (M, SD) is the Pearson correlation coefficient of mean pre-post differences in depression (M) and the respective standard deviation (SD). Q(df) is the heterogeneity index of the meta-analysis. In case of AD without trials that reported pre-post differences, the results for the post-values of depression scores also resulted in VR  $\approx$  1.00 (Agomelatine: VR = 0.96, CI 0.92-1.01; Fluvoxamine VR = 0.99, CI 0.88-1.12; Trazodone: VR = 0.96, CI 0.88-1.06. For Clomipramine and Milnacipran, no placebo-controlled trials were available.

\* p < .05, \*\* p < .01

<sup>a</sup>This result was caused by an outlier (Study Dube 2010, NCT00420004), and after removing this study, the heterogeneity index was Q(df=14)=7.36, p = 0.92.
