# Supplementary material for: What are the chances for personalised treatment with antidepressants? Detection of patient-by-treatment interaction with a variance ratio meta-analysis
Source: PubMed Central journal article supplement — BMJ Open. 2019 Dec 23;9(12):e034816. doi: 10.1136/bmjopen-2019-034816 (PMC7008413; doi:10.1136/bmjopen-2019-034816), 2019-12-23
Supplement: bmjopen-2019-034816supp003.pdf [file bmjopen-2019-034816supp003.pdf]

Supplementary Table 3: Different estimations of heterogeneity

|                                                                                             | VR   | CI-<br>lower | CI-<br>upper | I <sup>2</sup> (%) | p   |
|---------------------------------------------------------------------------------------------|------|--------------|--------------|--------------------|-----|
| <b>Estimator of heterogeneity</b>                                                           |      |              |              |                    |     |
| Restricted maximum-likelihood (same as in Winkelbaumer et al., 2019)                        | 1.01 | 0.99         | 1.02         | 0                  | .24 |
| With Knapp and Hartung (KH) adjustment                                                      | 1.01 | 1.00         | 1.02         | 0                  | .25 |
| Sidik-Jonkman (SJ)                                                                          | 1.01 | 0.99         | 1.02         | 32                 | .39 |
| With KH adjustment                                                                          | 1.01 | 1.00         | 1.02         | 32                 | .25 |
| Paule Mandel                                                                                | 1.01 | 0.99         | 1.02         | 0                  | .33 |
| With KH adjustment                                                                          | 1.01 | 1.00         | 1.02         | 0                  | .25 |
| Empirical Bayes                                                                             | 1.01 | 0.99         | 1.02         | 0                  | .33 |
| With KH adjustment                                                                          | 1.01 | 1.00         | 1.02         | 0                  | .25 |
| DerSimonian-Laird                                                                           | 1.01 | 0.99         | 1.02         | 0                  | .33 |
| With KH adjustment                                                                          | 1.01 | 1.00         | 1.02         | 0                  | .25 |
|                                                                                             |      |              |              |                    |     |
| <b>Unweighted results</b><br>(as recommended for tau <sup>2</sup> = 0 by Viechtbauer, 2010) |      |              |              |                    |     |
| Restricted maximum-likelihood (same as in Winkelbaumer et al. 2019)                         | 1.01 | 0.99         | 1.03         | 0                  | .24 |
| Sidik-Jonkman (SJ)                                                                          | 1.01 | 0.99         | 1.03         | 32                 | .30 |
|                                                                                             |      |              |              |                    |     |
| <b>Using manual values for tau<sup>2</sup></b>                                              |      |              |              |                    |     |
| tau <sup>2</sup> =0.0108 (3 times the SJ)                                                   | 1.01 | 0.99         | 1.03         | 59                 | .46 |
| tau <sup>2</sup> =0.036 (10 times the SJ)                                                   | 1.01 | 0.98         | 1.04         | 83                 | .59 |
| tau <sup>2</sup> =0.36 (100 times the SJ)                                                   | 1.01 | 0.92         | 1.11         | 98                 | .83 |
|                                                                                             |      |              |              |                    |     |
